# Supplementary material for: Exploration of Soil Functional Microbiomes—A Concept Proposal for Long-Term Fertilized Grasslands
Source: Plants (Basel). 2022 May 5;11(9):1253. doi: 10.3390/plants11091253 (PMC9102102; doi:10.3390/plants11091253)
Supplement: Supplementary file 1 [file plants-11-01253-s001.zip › Supp Table 1.XLSX]

## Sheet: Database
	Code		CH1	P1	P2	P3	P4	CH2	CH3	CH4	CH5	CH6	CH7	CH8	CX1	CH9	CH10	CX2	CX3	CX4	CX5	CX6	CX7	CX8	CX9	AA1	AA2	AA3	AA4	AA5	AA6	AM1	AM2
	Variant	Water	Pyruvic acid methyl ester	Tween 40	Tween 80	α-Cyclodextrin	Glycogen	d-Cellobiose	α-d-Lactose	β-Methyl-d-glucoside	d-Xylose	i-Erythritol	d-Mannitol	N-Acetyl-d-glucosamin e	d-Glucosaminic acid	Glucose-1-phosphate	d,l-α-Glycerol phosphate	d-Galactonic acid γ-lactone	d-Galacturonic acid	2-Hydroxy benzoic acid	4-Hydroxy benzoic acid	γ-Hydroxy butyric acid	Itaconic acid	α-Keto butyric acid	d-Malic acid	l-Arginine	l-Asparagine	l-Phenylalanine	l-Serine	l-Threonine	Glycyl-l-glutamic acid	Phenylethylamine	Putrescine	Sum	AWCD
V1	V1R1	0.329	0.98	2.227	2.145	1.025	1.595	1.658	1.706	1.392	2.213	1.255	1.774	2.655	2.416	1.545	0.808	1.345	2.179	0.353	2.023	1.238	2.644	1.98	1.414	2.253	2.295	2.411	2.227	1.319	1.716	2.143	1.225	54.159	1.41806
	V1R2	0.376	1.283	1.696	1.453	0.135	2.188	2.231	0.289	1.37	2.104	0.19	2.953	2.478	0.941	2.202	0.229	1.653	2.278	0.741	2.308	2.62	1.392	0.796	1.697	2.108	2.078	1.74	0.337	1.075	2.013	1.801	0.946	47.325	1.15061
	V1R3	0.128	1.504	2.012	1.854	0.137	0.162	1.839	0.156	0.154	0.45	1.811	2.385	2.777	1.177	0.145	0.186	1.375	1.624	1.609	1.943	1.974	1.339	1.139	1.475	2.133	2.851	2.026	1.815	1.365	0.349	2.15	0.88	42.796	1.25252
	V1R4	0.305	0.766	2.18	2.238	1	2.862	1.43	1.712	1.216	1.973	1.367	2.911	1.774	2.75	1.97	0.548	0.965	2.457	2.523	2.635	2.132	2.829	1.866	1.826	2.264	2.042	2.227	2.019	1.663	1.138	2.391	1.113	58.787	1.59135
V2	V2R1	0.233	2.083	2.481	2.415	1.93	3.071	2.691	2.095	2.27	1.764	1.342	1.745	2.314	1.341	1.649	0.551	1.471	1.432	2.994	2.302	2.56	2.706	0.85	1.491	2.833	2.502	2.152	1.858	1.29	1.164	2.772	1.073	61.192	1.74094
	V2R2	0.23	1.588	2.01	2.935	2.31	2.21	2.126	1.915	1.531	2.412	1.038	2.364	2.167	1.414	0.231	0.295	1.256	1.787	2.471	2.077	2.395	2.612	1.196	1.751	2.392	3.009	2.157	2.367	1.364	1.369	2.348	0.943	58.04	1.64226
	V2R3	0.347	1.263	2.309	1.503	1.922	2.191	2.165	1.912	2.154	1.795	2.427	1.978	2.01	1.811	1.801	0.409	1.563	2.058	2.171	2.827	2.71	2.714	1.378	1.457	2.333	2.374	2.55	1.88	1.402	1.937	1.771	0.862	59.637	1.57677
	V2R4	0.311	0.631	2.474	2.312	2.026	2.104	2.326	1.919	2.022	2.608	1.542	2.247	2.424	1.78	1.85	0.529	1.997	1.78	2.47	2.414	2.487	2.036	1.521	1.375	2.031	3.025	3.337	1.287	1.561	1.647	1.811	1.31	60.883	1.65297
V3	V3R1	0.283	0.944	1.705	2.562	2.021	2.127	2.12	1.803	1.617	1.782	1.905	2.668	2.154	1.198	1.236	0.348	2.265	2.337	1.246	1.908	1.931	2.377	1.332	1.201	2.621	2.832	2.721	1.859	1.536	1.396	1.902	0.71	56.364	1.53519
	V3R2	0.451	1.839	1.69	1.575	2.05	2.161	1.738	2.298	1.421	2.384	0.453	1.618	1.65	1.528	1.151	0.388	1.838	1.859	1.047	3.023	2.747	1.234	1.291	2.066	2.313	2.341	1.401	2.353	2.423	1.695	1.9	1.082	54.557	1.3089
	V3R3	0.198	1.775	2.031	2.063	0.045	1.411	3.268	1.589	0.437	0.765	0.66	2.266	2.322	3.049	0.279	0.313	1.761	2.377	2.125	2.134	2.877	1.156	1.293	2.047	2.517	2.955	2.654	0.612	1.558	0.362	2.247	0.941	51.889	1.47584
	V3R4	0.258	1.25	2.627	2.748	0.284	0.298	2.784	0.302	0.302	0.584	0.261	2.966	2.772	2.678	2.317	0.372	2.231	2.08	1.433	2.676	2.575	1.732	1.22	2.2	2.328	2.758	2.722	2.084	2.068	0.737	1.258	1.67	54.317	1.49416
V4	V4R1	0.13	1.536	1.948	2.061	0.422	1.778	1.177	0.375	0.187	0.723	0.155	2.473	2.713	0.965	0.187	0.295	1.606	2.255	2.404	1.464	3.105	1.93	1.223	2.401	1.798	2.729	2.631	2.052	1.917	0.202	0.626	0.544	45.882	1.35006
	V4R2	0.213	1.188	1.677	1.607	0.239	0.431	2.22	1.418	0.856	2.359	0.265	2.371	1.814	1.139	0.25	0.347	2.152	1.775	2.38	1.59	2.037	1.848	0.776	2.233	2.088	2.861	2.753	2.096	1.127	0.661	1.339	0.618	46.515	1.28748
	V4R3	0.348	1.732	2.507	1.805	0.36	0.41	1.238	0.393	0.321	0.526	0.327	3.075	2.663	2.604	0.47	0.4	1.471	2.4	0.535	2.213	3.703	1.436	1.449	0.489	2.823	2.152	3.107	0.47	2.07	0.801	2.684	0.389	47.023	1.16887
	V4R4	0.138	1.073	2.397	1.479	1.163	1.375	2.264	0.17	0.128	1.775	0.929	2.116	1.432	1.051	1.096	0.224	1.128	2.059	0.455	2.116	0.049	0.232	2.036	1.933	2.13	2.653	2.53	1.269	1.644	1.478	0.795	1.265	42.444	1.23116
V5	V5R1	0.197	1.284	1.495	1.269	0.206	1.734	1.65	1.666	1.421	1.665	0.194	2.452	1.469	1.173	0.308	0.542	1.149	1.937	2.09	2.578	2.603	0.261	1.386	1.711	1.409	2.767	2.307	2.561	2.066	1.251	2.191	1.306	48.101	1.35465
	V5R2	0.203	1.003	1.87	1.915	1.277	0.888	3.012	1.854	1.046	2.106	1.149	2.189	2.292	1.421	1.305	0.56	0.974	2.356	1.645	1.928	1.793	2.041	1.481	1.203	1.495	2.03	2.393	1.85	1.64	1.22	1.52	1.54	50.996	1.44203
	V5R3	0.282	1.588	1.76	1.443	1.62	1.97	2.182	1.895	1.283	2.006	1.693	2.252	2.172	1.06	1.291	0.417	1.73	0.964	1.318	2.317	2.33	3.215	1.017	0.983	1.704	2.623	1.377	1.607	1.064	1.169	1.859	0.071	49.98	1.33026
	V5R4	0.216	0.72	1.775	1.862	1.592	1.334	1.776	1.479	1.344	1.85	0.801	3.34	1.364	0.977	1.933	0.346	0.692	2.063	2.011	1.799	1.039	0.94	1.281	1.637	1.482	2.379	2.289	2.022	1.196	0.563	1.967	0.96	46.813	1.2941
Mean	V1		1.13325	2.02875	1.9225	0.57425	1.70175	1.7895	0.96575	1.033	1.685	1.15575	2.50575	2.421	1.821	1.4655	0.44275	1.3345	2.1345	1.3065	2.22725	1.991	2.051	1.44525	1.603	2.1895	2.3165	2.101	1.5995	1.3555	1.304	2.12125	1.041	50.7668	1.63764
	V2		1.39125	2.3185	2.29125	2.047	2.394	2.327	1.96025	1.99425	2.14475	1.58725	2.0835	2.22875	1.5865	1.38275	0.446	1.57175	1.76425	2.5265	2.405	2.538	2.517	1.23625	1.5185	2.39725	2.7275	2.549	1.848	1.40425	1.52925	2.1755	1.047	59.938	1.93348
	V3		1.452	2.01325	2.237	1.1	1.49925	2.4775	1.498	0.94425	1.37875	0.81975	2.3795	2.2245	2.11325	1.24575	0.35525	2.02375	2.16325	1.46275	2.43525	2.5325	1.62475	1.284	1.8785	2.44475	2.7215	2.3745	1.727	1.89625	1.0475	1.82675	1.10075	54.2817	1.75102
	V4		1.38225	2.13225	1.738	0.546	0.9985	1.72475	0.589	0.373	1.34575	0.419	2.50875	2.1555	1.43975	0.50075	0.3165	1.58925	2.12225	1.4435	1.84575	2.2235	1.3615	1.371	1.764	2.20975	2.59875	2.75525	1.47175	1.6895	0.7855	1.361	0.704	45.466	1.46665
	V5		1.14875	1.725	1.62225	1.17375	1.4815	2.155	1.7235	1.2735	1.90675	0.95925	2.55825	1.82425	1.15775	1.20925	0.46625	1.13625	1.83	1.766	2.1555	1.94125	1.61425	1.29125	1.3835	1.5225	2.44975	2.0915	2.01	1.4915	1.05075	1.88425	0.96925	48.9725	1.57976
Comparison		DEMSA approach
RAW data for math
	Code		CH1	P1	P2	P3	P4	CH2	CH3	CH4	CH5	CH6	CH7	CH8	CX1	CH9	CH10	CX2	CX3	CX4	CX5	CX6	CX7	CX8	CX9	AA1	AA2	AA3	AA4	AA5	AA6	AM1	AM2
Probe	VR	Water	Pyruvic acid methyl ester	Tween 40	Tween 80	α-Cyclodextrin	Glycogen	d-Cellobiose	α-d-Lactose	β-Methyl-d-glucoside	d-Xylose	i-Erythritol	d-Mannitol	N-Acetyl-d-glucosamin e	d-Glucosaminic acid	Glucose-1-phosphate	d,l-α-Glycerol phosphate	d-Galactonic acid γ-lactone	d-Galacturonic acid	2-Hydroxy benzoic acid	4-Hydroxy benzoic acid	γ-Hydroxy butyric acid	Itaconic acid	α-Keto butyric acid	d-Malic acid	l-Arginine	l-Asparagine	l-Phenylalanine	l-Serine	l-Threonine	Glycyl-l-glutamic acid	Phenylethylamine	Putrescine	Sum	AWCD
gx	V1Av		1.13325	2.02875	1.9225	0.57425	1.70175	1.7895	0.96575	1.033	1.685	1.15575	2.50575	2.421	1.821	1.4655	0.44275	1.3345	2.1345	1.3065	2.22725	1.991	2.051	1.44525	1.603	2.1895	2.3165	2.101	1.5995	1.3555	1.304	2.12125	1.041	50.7668	1.63764
gx %			2.23227	3.99622	3.78693	1.13115	3.3521	3.52494	1.90233	2.0348	3.3191	2.27659	4.93581	4.76887	3.58699	2.88673	0.872126	2.62869	4.20452	2.57353	4.38722	3.92186	4.04005	2.84684	3.15758	4.31286	4.56303	4.13854	3.15068	2.67005	2.56861	4.17842	2.05055	100	3.22581
gmin	V1m		0.955321	1.71022	1.62065	0.484089	1.43456	1.50854	0.81412	0.870811	1.42044	0.974289	2.11233	2.04089	1.53509	1.23541	0.373235	1.12497	1.79937	1.10137	1.87756	1.6784	1.72898	1.21834	1.35132	1.84573	1.95279	1.77113	1.34837	1.14268	1.09926	1.7882	0.877555	42.796
Diff narr			0.177929	0.318529	0.301847	0.0901614	0.267187	0.280965	0.15163	0.162189	0.264557	0.181461	0.393421	0.380115	0.28591	0.230094	0.069515	0.209526	0.335132	0.20513	0.349694	0.312602	0.322022	0.226915	0.251683	0.343767	0.363707	0.329872	0.251133	0.212823	0.204738	0.333052	0.163445
gMAX	V1M		1.31228	2.34926	2.22622	0.664971	1.9706	2.07221	1.11832	1.1962	1.9512	1.33834	2.90161	2.80348	2.10869	1.69702	0.512697	1.54533	2.47171	1.5129	2.57912	2.30554	2.37502	1.67357	1.85625	2.5354	2.68247	2.43292	1.85219	1.56965	1.51001	2.45637	1.20546	58.787	1.89635
Diff intens			0.179033	0.320507	0.303721	0.0907214	0.268846	0.282709	0.152571	0.163196	0.2662	0.182588	0.395864	0.382475	0.287686	0.231523	0.0699467	0.210827	0.337213	0.206404	0.351866	0.314543	0.324022	0.228324	0.253246	0.345902	0.365966	0.331921	0.252693	0.214145	0.206009	0.33512	0.16446
P6	V2		2.083	2.481	2.415	1.93	3.071	2.691	2.095	2.27	1.764	1.342	1.745	2.314	1.341	1.649	0.551	1.471	1.432	2.994	2.302	2.56	2.706	0.85	1.491	2.833	2.502	2.152	1.858	1.29	1.164	2.772	1.073	61.192	1.74094
P7	V2		1.588	2.01	2.935	2.31	2.21	2.126	1.915	1.531	2.412	1.038	2.364	2.167	1.414	0.231	0.295	1.256	1.787	2.471	2.077	2.395	2.612	1.196	1.751	2.392	3.009	2.157	2.367	1.364	1.369	2.348	0.943	58.04	1.64226
P8	V2		1.263	2.309	1.503	1.922	2.191	2.165	1.912	2.154	1.795	2.427	1.978	2.01	1.811	1.801	0.409	1.563	2.058	2.171	2.827	2.71	2.714	1.378	1.457	2.333	2.374	2.55	1.88	1.402	1.937	1.771	0.862	59.637	1.57677
P9	V2		0.631	2.474	2.312	2.026	2.104	2.326	1.919	2.022	2.608	1.542	2.247	2.424	1.78	1.85	0.529	1.997	1.78	2.47	2.414	2.487	2.036	1.521	1.375	2.031	3.025	3.337	1.287	1.561	1.647	1.811	1.31	60.883	1.65297
P10	V3		0.944	1.705	2.562	2.021	2.127	2.12	1.803	1.617	1.782	1.905	2.668	2.154	1.198	1.236	0.348	2.265	2.337	1.246	1.908	1.931	2.377	1.332	1.201	2.621	2.832	2.721	1.859	1.536	1.396	1.902	0.71	56.364	1.53519
P11	V3		1.839	1.69	1.575	2.05	2.161	1.738	2.298	1.421	2.384	0.453	1.618	1.65	1.528	1.151	0.388	1.838	1.859	1.047	3.023	2.747	1.234	1.291	2.066	2.313	2.341	1.401	2.353	2.423	1.695	1.9	1.082	54.557	1.3089
P12	V3		1.775	2.031	2.063	0.045	1.411	3.268	1.589	0.437	0.765	0.66	2.266	2.322	3.049	0.279	0.313	1.761	2.377	2.125	2.134	2.877	1.156	1.293	2.047	2.517	2.955	2.654	0.612	1.558	0.362	2.247	0.941	51.889	1.47584
P13	V3		1.25	2.627	2.748	0.284	0.298	2.784	0.302	0.302	0.584	0.261	2.966	2.772	2.678	2.317	0.372	2.231	2.08	1.433	2.676	2.575	1.732	1.22	2.2	2.328	2.758	2.722	2.084	2.068	0.737	1.258	1.67	54.317	1.49416
P14	V4		1.536	1.948	2.061	0.422	1.778	1.177	0.375	0.187	0.723	0.155	2.473	2.713	0.965	0.187	0.295	1.606	2.255	2.404	1.464	3.105	1.93	1.223	2.401	1.798	2.729	2.631	2.052	1.917	0.202	0.626	0.544	45.882	1.35006
P15	V4		1.188	1.677	1.607	0.239	0.431	2.22	1.418	0.856	2.359	0.265	2.371	1.814	1.139	0.25	0.347	2.152	1.775	2.38	1.59	2.037	1.848	0.776	2.233	2.088	2.861	2.753	2.096	1.127	0.661	1.339	0.618	46.515	1.28748
P16	V4		1.732	2.507	1.805	0.36	0.41	1.238	0.393	0.321	0.526	0.327	3.075	2.663	2.604	0.47	0.4	1.471	2.4	0.535	2.213	3.703	1.436	1.449	0.489	2.823	2.152	3.107	0.47	2.07	0.801	2.684	0.389	47.023	1.16887
P17	V4		1.073	2.397	1.479	1.163	1.375	2.264	0.17	0.128	1.775	0.929	2.116	1.432	1.051	1.096	0.224	1.128	2.059	0.455	2.116	0.049	0.232	2.036	1.933	2.13	2.653	2.53	1.269	1.644	1.478	0.795	1.265	42.444	1.23116
P18	V5		1.284	1.495	1.269	0.206	1.734	1.65	1.666	1.421	1.665	0.194	2.452	1.469	1.173	0.308	0.542	1.149	1.937	2.09	2.578	2.603	0.261	1.386	1.711	1.409	2.767	2.307	2.561	2.066	1.251	2.191	1.306	48.101	1.35465
P19	V5		1.003	1.87	1.915	1.277	0.888	3.012	1.854	1.046	2.106	1.149	2.189	2.292	1.421	1.305	0.56	0.974	2.356	1.645	1.928	1.793	2.041	1.481	1.203	1.495	2.03	2.393	1.85	1.64	1.22	1.52	1.54	50.996	1.44203
P20	V5		1.588	1.76	1.443	1.62	1.97	2.182	1.895	1.283	2.006	1.693	2.252	2.172	1.06	1.291	0.417	1.73	0.964	1.318	2.317	2.33	3.215	1.017	0.983	1.704	2.623	1.377	1.607	1.064	1.169	1.859	0.071	49.98	1.33026
P21	V5		0.72	1.775	1.862	1.592	1.334	1.776	1.479	1.344	1.85	0.801	3.34	1.364	0.977	1.933	0.346	0.692	2.063	2.011	1.799	1.039	0.94	1.281	1.637	1.482	2.379	2.289	2.022	1.196	0.563	1.967	0.96	46.813	1.2941
Base INCREASE matrix
	Code		CH1	P1	P2	P3	P4	CH2	CH3	CH4	CH5	CH6	CH7	CH8	CX1	CH9	CH10	CX2	CX3	CX4	CX5	CX6	CX7	CX8	CX9	AA1	AA2	AA3	AA4	AA5	AA6	AM1	AM2
Probe	VR	Water	Pyruvic acid methyl ester	Tween 40	Tween 80	α-Cyclodextrin	Glycogen	d-Cellobiose	α-d-Lactose	β-Methyl-d-glucoside	d-Xylose	i-Erythritol	d-Mannitol	N-Acetyl-d-glucosamin e	d-Glucosaminic acid	Glucose-1-phosphate	d,l-α-Glycerol phosphate	d-Galactonic acid γ-lactone	d-Galacturonic acid	2-Hydroxy benzoic acid	4-Hydroxy benzoic acid	γ-Hydroxy butyric acid	Itaconic acid	α-Keto butyric acid	d-Malic acid	l-Arginine	l-Asparagine	l-Phenylalanine	l-Serine	l-Threonine	Glycyl-l-glutamic acid	Phenylethylamine	Putrescine	Sum
P6	V2		2.083	2.481	2.415	1.93	3.071	2.691	2.095	2.27	1.764	1.342	0	0	0	1.649	0.551	1.471	0	2.994	2.302	2.56	2.706	0	0	2.833	2.502	2.152	1.858	0	0	2.772	1.073	49.565
P7	V2		1.588	0	2.935	2.31	2.21	2.126	1.915	1.531	2.412	0	0	0	0	0	0	0	0	2.471	0	2.395	2.612	0	1.751	2.392	3.009	2.157	2.367	1.364	1.369	2.348	0	41.262
P8	V2		1.263	2.309	0	1.922	2.191	2.165	1.912	2.154	1.795	2.427	0	0	0	1.801	0	1.563	0	2.171	2.827	2.71	2.714	0	0	2.333	2.374	2.55	1.88	1.402	1.937	0	0	44.4
P9	V2		0	2.474	2.312	2.026	2.104	2.326	1.919	2.022	2.608	1.542	0	2.424	0	1.85	0.529	1.997	0	2.47	2.414	2.487	0	1.521	0	0	3.025	3.337	0	1.561	1.647	0	1.31	45.905
P10	V3		0	0	2.562	2.021	2.127	2.12	1.803	1.617	1.782	1.905	2.668	0	0	0	0	2.265	2.337	0	0	0	2.377	0	0	2.621	2.832	2.721	1.859	1.536	1.396	0	0	38.549
P11	V3		1.839	0	0	2.05	2.161	0	2.298	1.421	2.384	0	0	0	0	0	0	1.838	0	0	3.023	2.747	0	0	2.066	2.313	2.341	0	2.353	2.423	1.695	0	1.082	34.034
P12	V3		1.775	2.031	2.063	0	0	3.268	1.589	0	0	0	0	0	3.049	0	0	1.761	2.377	2.125	0	2.877	0	0	2.047	2.517	2.955	2.654	0	1.558	0	2.247	0	36.893
P13	V3		1.25	2.627	2.748	0	0	2.784	0	0	0	0	2.966	2.772	2.678	2.317	0	2.231	0	1.433	2.676	2.575	0	0	2.2	2.328	2.758	2.722	2.084	2.068	0	0	1.67	44.887
P14	V4		1.536	0	2.061	0	1.778	0	0	0	0	0	0	2.713	0	0	0	1.606	2.255	2.404	0	3.105	0	0	2.401	0	2.729	2.631	2.052	1.917	0	0	0	29.188
P15	V4		1.188	0	0	0	0	2.22	1.418	0	2.359	0	0	0	0	0	0	2.152	0	2.38	0	2.037	0	0	2.233	0	2.861	2.753	2.096	0	0	0	0	23.697
P16	V4		1.732	2.507	0	0	0	0	0	0	0	0	3.075	2.663	2.604	0	0	1.471	2.4	0	0	3.703	0	1.449	0	2.823	0	3.107	0	2.07	0	2.684	0	32.288
P17	V4		0	2.397	0	1.163	0	2.264	0	0	1.775	0	0	0	0	0	0	0	0	0	0	0	0	2.036	1.933	0	2.653	2.53	0	1.644	1.478	0	1.265	21.138
P18	V5		1.284	0	0	0	1.734	0	1.666	1.421	0	0	0	0	0	0	0.542	0	0	2.09	2.578	2.603	0	0	1.711	0	2.767	2.307	2.561	2.066	0	2.191	1.306	28.827
P19	V5		0	0	0	1.277	0	3.012	1.854	1.046	2.106	0	0	0	0	0	0.56	0	2.356	1.645	0	0	0	1.481	0	0	0	2.393	1.85	1.64	0	0	1.54	22.76
P20	V5		1.588	0	0	1.62	1.97	2.182	1.895	1.283	2.006	1.693	0	0	0	0	0	1.73	0	1.318	2.317	2.33	3.215	0	0	0	2.623	0	1.607	0	0	0	0	29.377
P21	V5		0	0	0	1.592	0	0	1.479	1.344	1.85	0	3.34	0	0	1.933	0	0	0	2.011	0	0	0	0	1.637	0	2.379	2.289	2.022	0	0	0	0	21.876
EXPANSION Mat
	Code	A1	CH1	P1	P2	P3	P4	CH2	CH3	CH4	CH5	CH6	CH7	CH8	CX1	CH9	CH10	CX2	CX3	CX4	CX5	CX6	CX7	CX8	CX9	AA1	AA2	AA3	AA4	AA5	AA6	AM1	AM2
Probe	VR	Water	Pyruvic acid methyl ester	Tween 40	Tween 80	α-Cyclodextrin	Glycogen	d-Cellobiose	α-d-Lactose	β-Methyl-d-glucoside	d-Xylose	i-Erythritol	d-Mannitol	N-Acetyl-d-glucosamin e	d-Glucosaminic acid	Glucose-1-phosphate	d,l-α-Glycerol phosphate	d-Galactonic acid γ-lactone	d-Galacturonic acid	2-Hydroxy benzoic acid	4-Hydroxy benzoic acid	γ-Hydroxy butyric acid	Itaconic acid	α-Keto butyric acid	d-Malic acid	l-Arginine	l-Asparagine	l-Phenylalanine	l-Serine	l-Threonine	Glycyl-l-glutamic acid	Phenylethylamine	Putrescine	Sum
Px			1.13325	2.02875	1.9225	0.57425	1.70175	1.7895	0.96575	1.033	1.685	1.15575	2.50575	2.421	1.821	1.4655	0.44275	1.3345	2.1345	1.3065	2.22725	1.991	2.051	1.44525	1.603	2.1895	2.3165	2.101	1.5995	1.3555	1.304	2.12125	1.041	50.7668
P6	V2		0.770717	0.131743	0.188779	1.26503	1.1004	0.618791	0.976679	1.0738	0	0.00366191	0	0	0	0	0.0383033	0	0	1.4811	0	0.254457	0.330978	0	0	0.297598	0	0	0.00580725	0	0	0.31563	0	8.85348
P7	V2		0.275717	0	0.708779	1.64503	0.239404	0.0537906	0.796679	0.334804	0.4608	0	0	0	0	0	0	0	0	0.958096	0	0.0894572	0.236978	0	0	0	0.326534	0	0.514807	0	0	0	0	6.64087
P8	V2		0	0	0	1.25703	0.220404	0.0927906	0.793679	0.957804	0	1.08866	0	0	0	0.103977	0	0.0176726	0	0.658096	0.247884	0.404457	0.338978	0	0	0	0	0.117079	0.0278072	0	0.426991	0	0	6.75331
P9	V2		0	0.124743	0.0857789	1.36103	0.133404	0.253791	0.800679	0.825804	0.6568	0.203662	0	0	0	0.152977	0.0163033	0.451673	0	0.957096	0	0.181457	0	0	0	0	0.342534	0.904079	0	0	0.136991	0	0.10454	7.69334
P10	V3		0	0	0.335779	1.35603	0.156404	0.0477906	0.684679	0.420804	0	0.566662	0	0	0	0	0	0.719673	0	0	0	0	0.00197822	0	0	0.0855977	0.149534	0.288079	0.00680725	0	0	0	0	4.81982
P11	V3		0.526717	0	0	1.38503	0.190404	0	1.17968	0.224804	0.4328	0	0	0	0	0	0	0.292673	0	0	0.443884	0.441457	0	0	0.209754	0	0	0	0.500807	0.853355	0.184991	0	0	6.86635
P12	V3		0.462717	0	0	0	0	1.19579	0.470679	0	0	0	0	0	0.940314	0	0	0.215673	0	0.612096	0	0.571457	0	0	0.190754	0	0.272534	0.221079	0	0	0	0	0	5.15309
P13	V3		0	0.277743	0.521779	0	0	0.711791	0	0	0	0	0.0643857	0	0.569314	0.619977	0	0.685673	0	0	0.0968838	0.269457	0	0	0.343754	0	0.0755339	0.289079	0.231807	0.498355	0	0	0.46454	5.72007
P14	V4		0.223717	0	0	0	0	0	0	0	0	0	0	0	0	0	0	0.0606726	0	0.891096	0	0.799457	0	0	0.544754	0	0.0465339	0.198079	0.199807	0.347355	0	0	0	3.31147
P15	V4		0	0	0	0	0	0.147791	0.299679	0	0.4078	0	0	0	0	0	0	0.606673	0	0.867096	0	0	0	0	0.376754	0	0.178534	0.320079	0.243807	0	0	0	0	3.44821
P16	V4		0.419717	0.157743	0	0	0	0	0	0	0	0	0.173386	0	0.495314	0	0	0	0	0	0	1.39746	0	0	0	0.287598	0	0.674079	0	0.500355	0	0.22763	0	4.33328
P17	V4		0	0.0477433	0	0.498029	0	0.191791	0	0	0	0	0	0	0	0	0	0	0	0	0	0	0	0.362426	0.0767543	0	0	0.0970791	0	0.0743549	0	0	0.0595404	1.40772
P18	V5		0	0	0	0	0	0	0.547679	0.224804	0	0	0	0	0	0	0.0293033	0	0	0.577096	0	0.297457	0	0	0	0	0.0845339	0	0.708807	0.496355	0	0	0.10054	3.06658
P19	V5		0	0	0	0.612029	0	0.939791	0.735679	0	0.1548	0	0	0	0	0	0.0473033	0	0	0.132096	0	0	0	0	0	0	0	0	0	0.0703549	0	0	0.33454	3.02659
P20	V5		0.275717	0	0	0.955029	0	0.109791	0.776679	0.0868042	0.0547998	0.354662	0	0	0	0	0	0.184673	0	0	0	0.0244572	0.839978	0	0	0	0	0	0	0	0	0	0	3.66259
P21	V5		0	0	0	0.927029	0	0	0.360679	0.147804	0	0	0.438386	0	0	0.235977	0	0	0	0.498096	0	0	0	0	0	0	0	0	0.169807	0	0	0	0	2.77778
Intensification Matrix
	Code		CH1	P1	P2	P3	P4	CH2	CH3	CH4	CH5	CH6	CH7	CH8	CX1	CH9	CH10	CX2	CX3	CX4	CX5	CX6	CX7	CX8	CX9	AA1	AA2	AA3	AA4	AA5	AA6	AM1	AM2
Probe	VR	Water	Pyruvic acid methyl ester	Tween 40	Tween 80	α-Cyclodextrin	Glycogen	d-Cellobiose	α-d-Lactose	β-Methyl-d-glucoside	d-Xylose	i-Erythritol	d-Mannitol	N-Acetyl-d-glucosamin e	d-Glucosaminic acid	Glucose-1-phosphate	d,l-α-Glycerol phosphate	d-Galactonic acid γ-lactone	d-Galacturonic acid	2-Hydroxy benzoic acid	4-Hydroxy benzoic acid	γ-Hydroxy butyric acid	Itaconic acid	α-Keto butyric acid	d-Malic acid	l-Arginine	l-Asparagine	l-Phenylalanine	l-Serine	l-Threonine	Glycyl-l-glutamic acid	Phenylethylamine	Putrescine	Sum
P6	V2		0.179033	0.320507	0.303721	0.0907214	0.268846	0.282709	0.152571	0.163196	0.079	0.182588	0	0	0	0.1835	0.0699467	0.1365	0	0.206404	0.07475	0.314543	0.324022	0	0	0.345902	0.1855	0.051	0.252693	0	0	0.33512	0.032	4.53477
P7	V2		0.179033	0	0.303721	0.0907214	0.268846	0.282709	0.152571	0.163196	0.2662	0	0	0	0	0	0	0	0	0.206404	0	0.314543	0.324022	0	0.148	0.2025	0.365966	0.056	0.252693	0.0085	0.065	0.22675	0	3.87738
P8	V2		0.12975	0.28025	0	0.0907214	0.268846	0.282709	0.152571	0.163196	0.11	0.182588	0	0	0	0.231523	0	0.210827	0	0.206404	0.351866	0.314543	0.324022	0	0	0.1435	0.0575	0.331921	0.252693	0.0465	0.206009	0	0	4.33794
P9	V2		0	0.320507	0.303721	0.0907214	0.268846	0.282709	0.152571	0.163196	0.2662	0.182588	0	0.003	0	0.231523	0.0699467	0.210827	0	0.206404	0.18675	0.314543	0	0.07575	0	0	0.365966	0.331921	0	0.2055	0.206009	0	0.16446	4.60366
P10	V3		0	0	0.303721	0.0907214	0.268846	0.282709	0.152571	0.163196	0.097	0.182588	0.16225	0	0	0	0	0.210827	0.2025	0	0	0	0.324022	0	0	0.345902	0.365966	0.331921	0.252693	0.1805	0.092	0	0	4.00993
P11	V3		0.179033	0	0	0.0907214	0.268846	0	0.152571	0.163196	0.2662	0	0	0	0	0	0	0.210827	0	0	0.351866	0.314543	0	0	0.253246	0.1235	0.0245	0	0.252693	0.214145	0.206009	0	0.041	3.1129
P12	V3		0.179033	0.00225	0.1405	0	0	0.282709	0.152571	0	0	0	0	0	0.287686	0	0	0.210827	0.2425	0.206404	0	0.314543	0	0	0.253246	0.3275	0.365966	0.331921	0	0.2025	0	0.12575	0	3.62591
P13	V3		0.11675	0.320507	0.303721	0	0	0.282709	0	0	0	0	0.395864	0.351	0.287686	0.231523	0	0.210827	0	0.1265	0.351866	0.314543	0	0	0.253246	0.1385	0.365966	0.331921	0.252693	0.214145	0	0	0.16446	5.01443
P14	V4		0.179033	0	0.1385	0	0.07625	0	0	0	0	0	0	0.292	0	0	0	0.210827	0.1205	0.206404	0	0.314543	0	0	0.253246	0	0.365966	0.331921	0.252693	0.214145	0	0	0	2.95603
P15	V4		0.05475	0	0	0	0	0.282709	0.152571	0	0.2662	0	0	0	0	0	0	0.210827	0	0.206404	0	0.046	0	0	0.253246	0	0.365966	0.331921	0.252693	0	0	0	0	2.42329
P16	V4		0.179033	0.320507	0	0	0	0	0	0	0	0	0.395864	0.242	0.287686	0	0	0.1365	0.2655	0	0	0.314543	0	0.00375	0	0.345902	0	0.331921	0	0.214145	0	0.33512	0	3.37247
P17	V4		0	0.320507	0	0.0907214	0	0.282709	0	0	0.09	0	0	0	0	0	0	0	0	0	0	0	0	0.228324	0.253246	0	0.3365	0.331921	0	0.214145	0.174	0	0.16446	2.48653
P18	V5		0.15075	0	0	0	0.03225	0	0.152571	0.163196	0	0	0	0	0	0	0.0699467	0	0	0.206404	0.35075	0.314543	0	0	0.108	0	0.365966	0.206	0.252693	0.214145	0	0.06975	0.16446	2.82142
P19	V5		0	0	0	0.0907214	0	0.282709	0.152571	0.013	0.2662	0	0	0	0	0	0.0699467	0	0.2215	0.206404	0	0	0	0.03575	0	0	0	0.292	0.2505	0.214145	0	0	0.16446	2.25991
P20	V5		0.179033	0	0	0.0907214	0.26825	0.282709	0.152571	0.163196	0.2662	0.182588	0	0	0	0	0	0.210827	0	0.0115	0.08975	0.314543	0.324022	0	0	0	0.3065	0	0.0075	0	0	0	0	2.84991
P21	V5		0	0	0	0.0907214	0	0	0.152571	0.163196	0.165	0	0.395864	0	0	0.231523	0	0	0	0.206404	0	0	0	0	0.034	0	0.0625	0.188	0.252693	0	0	0	0	1.94247
Base DECREASE Matrix
	Code		CH1	P1	P2	P3	P4	CH2	CH3	CH4	CH5	CH6	CH7	CH8	CX1	CH9	CH10	CX2	CX3	CX4	CX5	CX6	CX7	CX8	CX9	AA1	AA2	AA3	AA4	AA5	AA6	AM1	AM2
Probe	VR	Water	Pyruvic acid methyl ester	Tween 40	Tween 80	α-Cyclodextrin	Glycogen	d-Cellobiose	α-d-Lactose	β-Methyl-d-glucoside	d-Xylose	i-Erythritol	d-Mannitol	N-Acetyl-d-glucosamin e	d-Glucosaminic acid	Glucose-1-phosphate	d,l-α-Glycerol phosphate	d-Galactonic acid γ-lactone	d-Galacturonic acid	2-Hydroxy benzoic acid	4-Hydroxy benzoic acid	γ-Hydroxy butyric acid	Itaconic acid	α-Keto butyric acid	d-Malic acid	l-Arginine	l-Asparagine	l-Phenylalanine	l-Serine	l-Threonine	Glycyl-l-glutamic acid	Phenylethylamine	Putrescine	Sum
P6	V2		0	0	0	0	0	0	0	0	0	0	1.745	2.314	1.341	0	0	0	1.432	0	0	0	0	0.85	1.491	0	0	0	0	1.29	1.164	0	0	11.627
P7	V2		0	2.01	0	0	0	0	0	0	0	1.038	2.364	2.167	1.414	0.231	0.295	1.256	1.787	0	2.077	0	0	1.196	0	0	0	0	0	0	0	0	0.943	16.778
P8	V2		0	0	1.503	0	0	0	0	0	0	0	1.978	2.01	1.811	0	0.409	0	2.058	0	0	0	0	1.378	1.457	0	0	0	0	0	0	1.771	0.862	15.237
P9	V2		0.631	0	0	0	0	0	0	0	0	0	2.247	0	1.78	0	0	0	1.78	0	0	0	2.036	0	1.375	2.031	0	0	1.287	0	0	1.811	0	14.978
P10	V3		0.944	1.705	0	0	0	0	0	0	0	0	0	2.154	1.198	1.236	0.348	0	0	1.246	1.908	1.931	0	1.332	1.201	0	0	0	0	0	0	1.902	0.71	17.815
P11	V3		0	1.69	1.575	0	0	1.738	0	0	0	0.453	1.618	1.65	1.528	1.151	0.388	0	1.859	1.047	0	0	1.234	1.291	0	0	0	1.401	0	0	0	1.9	0	20.523
P12	V3		0	0	0	0.045	1.411	0	0	0.437	0.765	0.66	2.266	2.322	0	0.279	0.313	0	0	0	2.134	0	1.156	1.293	0	0	0	0	0.612	0	0.362	0	0.941	14.996
P13	V3		0	0	0	0.284	0.298	0	0.302	0.302	0.584	0.261	0	0	0	0	0.372	0	2.08	0	0	0	1.732	1.22	0	0	0	0	0	0	0.737	1.258	0	9.43
P14	V4		0	1.948	0	0.422	0	1.177	0.375	0.187	0.723	0.155	2.473	0	0.965	0.187	0.295	0	0	0	1.464	0	1.93	1.223	0	1.798	0	0	0	0	0.202	0.626	0.544	16.694
P15	V4		0	1.677	1.607	0.239	0.431	0	0	0.856	0	0.265	2.371	1.814	1.139	0.25	0.347	0	1.775	0	1.59	0	1.848	0.776	0	2.088	0	0	0	1.127	0.661	1.339	0.618	22.818
P16	V4		0	0	1.805	0.36	0.41	1.238	0.393	0.321	0.526	0.327	0	0	0	0.47	0.4	0	0	0.535	2.213	0	1.436	0	0.489	0	2.152	0	0.47	0	0.801	0	0.389	14.735
P17	V4		1.073	0	1.479	0	1.375	0	0.17	0.128	0	0.929	2.116	1.432	1.051	1.096	0.224	1.128	2.059	0.455	2.116	0.049	0.232	0	0	2.13	0	0	1.269	0	0	0.795	0	21.306
P18	V5		0	1.495	1.269	0.206	0	1.65	0	0	1.665	0.194	2.452	1.469	1.173	0.308	0	1.149	1.937	0	0	0	0.261	1.386	0	1.409	0	0	0	0	1.251	0	0	19.274
P19	V5		1.003	1.87	1.915	0	0.888	0	0	0	0	1.149	2.189	2.292	1.421	1.305	0	0.974	0	0	1.928	1.793	2.041	0	1.203	1.495	2.03	0	0	0	1.22	1.52	0	28.236
P20	V5		0	1.76	1.443	0	0	0	0	0	0	0	2.252	2.172	1.06	1.291	0.417	0	0.964	0	0	0	0	1.017	0.983	1.704	0	1.377	0	1.064	1.169	1.859	0.071	20.603
P21	V5		0.72	1.775	1.862	0	1.334	1.776	0	0	0	0.801	0	1.364	0.977	0	0.346	0.692	2.063	0	1.799	1.039	0.94	1.281	0	1.482	0	0	0	1.196	0.563	1.967	0.96	24.937
CONTRACTION Matrix
	Code		CH1	P1	P2	P3	P4	CH2	CH3	CH4	CH5	CH6	CH7	CH8	CX1	CH9	CH10	CX2	CX3	CX4	CX5	CX6	CX7	CX8	CX9	AA1	AA2	AA3	AA4	AA5	AA6	AM1	AM2
Probe	VR	Water	Pyruvic acid methyl ester	Tween 40	Tween 80	α-Cyclodextrin	Glycogen	d-Cellobiose	α-d-Lactose	β-Methyl-d-glucoside	d-Xylose	i-Erythritol	d-Mannitol	N-Acetyl-d-glucosamin e	d-Glucosaminic acid	Glucose-1-phosphate	d,l-α-Glycerol phosphate	d-Galactonic acid γ-lactone	d-Galacturonic acid	2-Hydroxy benzoic acid	4-Hydroxy benzoic acid	γ-Hydroxy butyric acid	Itaconic acid	α-Keto butyric acid	d-Malic acid	l-Arginine	l-Asparagine	l-Phenylalanine	l-Serine	l-Threonine	Glycyl-l-glutamic acid	Phenylethylamine	Putrescine	Sum
P6	V2		0	0	0	0	0	0	0	0	0	0	0.367329	0	0.19409	0	0	0	0.367368	0	0	0	0	0.368335	0	0	0	0	0	0	0	0	0	1.29712
P7	V2		0	0	0	0	0	0	0	0	0	0	0	0	0.12109	1.00441	0.078235	0	0.0123679	0	0	0	0	0.0223352	0	0	0	0	0	0	0	0	0	1.23843
P8	V2		0	0	0.117653	0	0	0	0	0	0	0	0.134329	0.0308853	0	0	0	0	0	0	0	0	0	0	0	0	0	0	0	0	0	0.0171983	0.0155554	0.315621
P9	V2		0.324321	0	0	0	0	0	0	0	0	0	0	0	0	0	0	0	0.0193679	0	0	0	0	0	0	0	0	0	0.0613668	0	0	0	0	0.405056
P10	V3		0.0113215	0.00522145	0	0	0	0	0	0	0	0	0	0	0.33709	0	0.025235	0	0	0	0	0	0	0	0.150317	0	0	0	0	0	0	0	0.167555	0.69674
P11	V3		0	0.0202215	0.0456535	0	0	0	0	0	0	0.521289	0.494329	0.390885	0.00708972	0.0844058	0	0	0	0.05437	0	0	0.494978	0	0	0	0	0.370128	0	0	0	0	0	2.48335
P12	V3		0	0	0	0.439089	0.0235628	0	0	0.433811	0.655443	0.314289	0	0	0	0.956406	0.060235	0	0	0	0	0	0.572978	0	0	0	0	0	0.736367	0	0.737262	0	0	4.92944
P13	V3		0	0	0	0.200089	1.13656	0	0.51212	0.568811	0.836443	0.713289	0	0	0	0	0.00123502	0	0	0	0	0	0	0	0	0	0	0	0	0	0.362262	0.530198	0	4.86101
P14	V4		0	0	0	0.0620886	0	0.331535	0.43912	0.683811	0.697443	0.819289	0	0	0.57009	1.04841	0.078235	0	0	0	0.413556	0	0	0	0	0.0477325	0	0	0	0	0.897262	1.1622	0.333555	7.58432
P15	V4		0	0.0332215	0.0136535	0.245089	1.00356	0	0	0.0148115	0	0.709289	0	0.226885	0.39609	0.985406	0.026235	0	0.0243679	0	0.287556	0	0	0.442335	0	0	0	0	0	0.0156766	0.438262	0.449198	0.259555	5.57119
P16	V4		0	0	0	0.124089	1.02456	0.270535	0.42112	0.549811	0.894443	0.647289	0	0	0	0.765406	0	0	0	0.56637	0	0	0.292978	0	0.862317	0	0	0	0.878367	0	0.298262	0	0.488555	8.08411
P17	V4		0	0	0.141653	0	0.0595628	0	0.64412	0.742811	0	0.0452888	0	0.608885	0.48409	0.139406	0.149235	0	0	0.64637	0	1.6294	1.49698	0	0	0	0	0	0.0793668	0	0	0.993198	0	7.86036
P18	V5		0	0.215221	0.351653	0.278089	0	0	0	0	0	0.780289	0	0.571885	0.36209	0.927406	0	0	0	0	0	0	1.46798	0	0	0.436733	0	0	0	0	0	0	0	5.39134
P19	V5		0	0	0	0	0.546563	0	0	0	0	0	0	0	0.11409	0	0	0.150974	0	0	0	0	0	0	0.148317	0.350733	0	0	0	0	0	0.268198	0	1.57887
P20	V5		0	0	0.177653	0	0	0	0	0	0	0	0	0	0.47509	0	0	0	0.835368	0	0	0	0	0.201335	0.368317	0.141733	0	0.394128	0	0.0786766	0	0	0.806555	3.47886
P21	V5		0.235321	0	0	0	0.100563	0	0	0	0	0.173289	0	0.676885	0.55809	0	0.027235	0.432974	0	0	0.0785555	0.639398	0.788978	0	0	0.363733	0	0	0	0	0.536262	0	0	4.61128
NARROWING matrix
	Code		CH1	P1	P2	P3	P4	CH2	CH3	CH4	CH5	CH6	CH7	CH8	CX1	CH9	CH10	CX2	CX3	CX4	CX5	CX6	CX7	CX8	CX9	AA1	AA2	AA3	AA4	AA5	AA6	AM1	AM2
Probe	VR	Water	Pyruvic acid methyl ester	Tween 40	Tween 80	α-Cyclodextrin	Glycogen	d-Cellobiose	α-d-Lactose	β-Methyl-d-glucoside	d-Xylose	i-Erythritol	d-Mannitol	N-Acetyl-d-glucosamin e	d-Glucosaminic acid	Glucose-1-phosphate	d,l-α-Glycerol phosphate	d-Galactonic acid γ-lactone	d-Galacturonic acid	2-Hydroxy benzoic acid	4-Hydroxy benzoic acid	γ-Hydroxy butyric acid	Itaconic acid	α-Keto butyric acid	d-Malic acid	l-Arginine	l-Asparagine	l-Phenylalanine	l-Serine	l-Threonine	Glycyl-l-glutamic acid	Phenylethylamine	Putrescine	Sum
P6	V2		0	0	0	0	0	0	0	0	0	0	0.393421	0.107	0.28591	0	0	0	0.335132	0	0	0	0	0.226915	0.112	0	0	0	0	0.0655	0.14	0	0	1.66588
P7	V2		0	0.01875	0	0	0	0	0	0	0	0.11775	0.14175	0.254	0.28591	0.230094	0.069515	0.0785	0.335132	0	0.15025	0	0	0.226915	0	0	0	0	0	0	0	0	0.098	2.00657
P8	V2		0	0	0.301847	0	0	0	0	0	0	0	0.393421	0.380115	0.01	0	0.03375	0	0.0765	0	0	0	0	0.06725	0.146	0	0	0	0	0	0	0.333052	0.163445	1.90538
P9	V2		0.177929	0	0	0	0	0	0	0	0	0	0.25875	0	0.041	0	0	0	0.335132	0	0	0	0.015	0	0.228	0.1585	0	0	0.251133	0	0	0.31025	0	1.77569
P10	V3		0.177929	0.318529	0	0	0	0	0	0	0	0	0	0.267	0.28591	0.2295	0.069515	0	0	0.0605	0.31925	0.06	0	0.11325	0.251683	0	0	0	0	0	0	0.21925	0.163445	2.53576
P11	V3		0	0.318529	0.301847	0	0	0.0515	0	0	0	0.181461	0.393421	0.380115	0.28591	0.230094	0.05475	0	0.2755	0.20513	0	0	0.322022	0.15425	0	0	0	0.329872	0	0	0	0.22125	0	3.70565
P12	V3		0	0	0	0.0901614	0.267187	0	0	0.162189	0.264557	0.181461	0.23975	0.099	0	0.230094	0.069515	0	0	0	0.09325	0	0.322022	0.15225	0	0	0	0	0.251133	0	0.204738	0	0.1	2.72731
P13	V3		0	0	0	0.0901614	0.267187	0	0.15163	0.162189	0.264557	0.181461	0	0	0	0	0.069515	0	0.0545	0	0	0	0.319	0.22525	0	0	0	0	0	0	0.204738	0.333052	0	2.32324
P14	V4		0	0.08075	0	0.0901614	0	0.280965	0.15163	0.162189	0.264557	0.181461	0.03275	0	0.28591	0.230094	0.069515	0	0	0	0.349694	0	0.121	0.22225	0	0.343767	0	0	0	0	0.204738	0.333052	0.163445	3.56793
P15	V4		0	0.318529	0.301847	0.0901614	0.267187	0	0	0.162189	0	0.181461	0.13475	0.380115	0.28591	0.230094	0.069515	0	0.335132	0	0.349694	0	0.203	0.226915	0	0.1015	0	0	0	0.212823	0.204738	0.333052	0.163445	4.55206
P16	V4		0	0	0.1175	0.0901614	0.267187	0.280965	0.15163	0.162189	0.264557	0.181461	0	0	0	0.230094	0.04275	0	0	0.20513	0.01425	0	0.322022	0	0.251683	0	0.1645	0	0.251133	0	0.204738	0	0.163445	3.36539
P17	V4		0.06025	0	0.301847	0	0.267187	0	0.15163	0.162189	0	0.181461	0.38975	0.380115	0.28591	0.230094	0.069515	0.2065	0.0755	0.20513	0.11125	0.312602	0.322022	0	0	0.0595	0	0	0.251133	0	0	0.333052	0	4.35664
P18	V5		0	0.318529	0.301847	0.0901614	0	0.1395	0	0	0.02	0.181461	0.05375	0.380115	0.28591	0.230094	0	0.1855	0.1975	0	0	0	0.322022	0.05925	0	0.343767	0	0	0	0	0.053	0	0	3.16241
P19	V5		0.13025	0.15875	0.0075	0	0.267187	0	0	0	0	0.00675	0.31675	0.129	0.28591	0.1605	0	0.209526	0	0	0.29925	0.198	0.01	0	0.251683	0.343767	0.2865	0	0	0	0.084	0.333052	0	3.47838
P20	V5		0	0.26875	0.301847	0	0	0	0	0	0	0	0.25375	0.249	0.28591	0.1745	0.02575	0	0.335132	0	0	0	0	0.226915	0.251683	0.343767	0	0.329872	0	0.212823	0.135	0.26225	0.163445	3.82039
P21	V5		0.177929	0.25375	0.0605	0	0.267187	0.0135	0	0	0	0.181461	0	0.380115	0.28591	0	0.069515	0.209526	0.0715	0	0.349694	0.312602	0.322022	0.16425	0	0.343767	0	0	0	0.1595	0.204738	0.15425	0.081	4.06272
Sahring matrix
	Code		CH1	P1	P2	P3	P4	CH2	CH3	CH4	CH5	CH6	CH7	CH8	CX1	CH9	CH10	CX2	CX3	CX4	CX5	CX6	CX7	CX8	CX9	AA1	AA2	AA3	AA4	AA5	AA6	AM1	AM2
Probe	VR	Water	Pyruvic acid methyl ester	Tween 40	Tween 80	α-Cyclodextrin	Glycogen	d-Cellobiose	α-d-Lactose	β-Methyl-d-glucoside	d-Xylose	i-Erythritol	d-Mannitol	N-Acetyl-d-glucosamin e	d-Glucosaminic acid	Glucose-1-phosphate	d,l-α-Glycerol phosphate	d-Galactonic acid γ-lactone	d-Galacturonic acid	2-Hydroxy benzoic acid	4-Hydroxy benzoic acid	γ-Hydroxy butyric acid	Itaconic acid	α-Keto butyric acid	d-Malic acid	l-Arginine	l-Asparagine	l-Phenylalanine	l-Serine	l-Threonine	Glycyl-l-glutamic acid	Phenylethylamine	Putrescine	Sum
Px	V1		1.13325	2.02875	1.9225	0.57425	1.70175	1.7895	0.96575	1.033	1.685	1.15575	2.50575	2.421	1.821	1.4655	0.44275	1.3345	2.1345	1.3065	2.22725	1.991	2.051	1.44525	1.603	2.1895	2.3165	2.101	1.5995	1.3555	1.304	2.12125	1.041	50.7668
P6	V2		1.13325	2.02875	1.9225	0.57425	1.70175	1.7895	0.96575	1.033	1.685	1.15575	1.745	2.314	1.341	1.4655	0.44275	1.3345	1.432	1.3065	2.22725	1.991	2.051	0.85	1.491	2.1895	2.3165	2.101	1.5995	1.29	1.164	2.12125	1.041	47.8037
P7	V2		1.13325	2.01	1.9225	0.57425	1.70175	1.7895	0.96575	1.033	1.685	1.038	2.364	2.167	1.414	0.231	0.295	1.256	1.787	1.3065	2.077	1.991	2.051	1.196	1.603	2.1895	2.3165	2.101	1.5995	1.3555	1.304	2.12125	0.943	47.5217
P8	V2		1.13325	2.02875	1.503	0.57425	1.70175	1.7895	0.96575	1.033	1.685	1.15575	1.978	2.01	1.811	1.4655	0.409	1.3345	2.058	1.3065	2.22725	1.991	2.051	1.378	1.457	2.1895	2.3165	2.101	1.5995	1.3555	1.304	1.771	0.862	48.5457
P9	V2		0.631	2.02875	1.9225	0.57425	1.70175	1.7895	0.96575	1.033	1.685	1.15575	2.247	2.421	1.78	1.4655	0.44275	1.3345	1.78	1.3065	2.22725	1.991	2.036	1.44525	1.375	2.031	2.3165	2.101	1.287	1.3555	1.304	1.811	1.041	48.586
P10	V3		0.944	1.705	1.9225	0.57425	1.70175	1.7895	0.96575	1.033	1.685	1.15575	2.50575	2.154	1.198	1.236	0.348	1.3345	2.1345	1.246	1.908	1.931	2.051	1.332	1.201	2.1895	2.3165	2.101	1.5995	1.3555	1.304	1.902	0.71	47.5343
P11	V3		1.13325	1.69	1.575	0.57425	1.70175	1.738	0.96575	1.033	1.685	0.453	1.618	1.65	1.528	1.151	0.388	1.3345	1.859	1.047	2.22725	1.991	1.234	1.291	1.603	2.1895	2.3165	1.401	1.5995	1.3555	1.304	1.9	1.041	44.5778
P12	V3		1.13325	2.02875	1.9225	0.045	1.411	1.7895	0.96575	0.437	0.765	0.66	2.266	2.322	1.821	0.279	0.313	1.3345	2.1345	1.3065	2.134	1.991	1.156	1.293	1.603	2.1895	2.3165	2.101	0.612	1.3555	0.362	2.12125	0.941	43.11
P13	V3		1.13325	2.02875	1.9225	0.284	0.298	1.7895	0.302	0.302	0.584	0.261	2.50575	2.421	1.821	1.4655	0.372	1.3345	2.08	1.3065	2.22725	1.991	1.732	1.22	1.603	2.1895	2.3165	2.101	1.5995	1.3555	0.737	1.258	1.041	43.5825
P14	V4		1.13325	1.948	1.9225	0.422	1.70175	1.177	0.375	0.187	0.723	0.155	2.473	2.421	0.965	0.187	0.295	1.3345	2.1345	1.3065	1.464	1.991	1.93	1.223	1.603	1.798	2.3165	2.101	1.5995	1.3555	0.202	0.626	0.544	39.6145
P15	V4		1.13325	1.677	1.607	0.239	0.431	1.7895	0.96575	0.856	1.685	0.265	2.371	1.814	1.139	0.25	0.347	1.3345	1.775	1.3065	1.59	1.991	1.848	0.776	1.603	2.088	2.3165	2.101	1.5995	1.127	0.661	1.339	0.618	40.6435
P16	V4		1.13325	2.02875	1.805	0.36	0.41	1.238	0.393	0.321	0.526	0.327	2.50575	2.421	1.821	0.47	0.4	1.3345	2.1345	0.535	2.213	1.991	1.436	1.44525	0.489	2.1895	2.152	2.101	0.47	1.3555	0.801	2.12125	0.389	39.3172
P17	V4		1.073	2.02875	1.479	0.57425	1.375	1.7895	0.17	0.128	1.685	0.929	2.116	1.432	1.051	1.096	0.224	1.128	2.059	0.455	2.116	0.049	0.232	1.44525	1.603	2.13	2.3165	2.101	1.269	1.3555	1.304	0.795	1.041	38.5497
P18	V5		1.13325	1.495	1.269	0.206	1.70175	1.65	0.96575	1.033	1.665	0.194	2.452	1.469	1.173	0.308	0.44275	1.149	1.937	1.3065	2.22725	1.991	0.261	1.386	1.603	1.409	2.3165	2.101	1.5995	1.3555	1.251	2.12125	1.041	42.213
P19	V5		1.003	1.87	1.915	0.57425	0.888	1.7895	0.96575	1.033	1.685	1.149	2.189	2.292	1.421	1.305	0.44275	0.974	2.1345	1.3065	1.928	1.793	2.041	1.44525	1.203	1.495	2.03	2.101	1.5995	1.3555	1.22	1.52	1.041	45.7095
P20	V5		1.13325	1.76	1.443	0.57425	1.70175	1.7895	0.96575	1.033	1.685	1.15575	2.252	2.172	1.06	1.291	0.417	1.3345	0.964	1.3065	2.22725	1.991	2.051	1.017	0.983	1.704	2.3165	1.377	1.5995	1.064	1.169	1.859	0.071	43.4675
P21	V5		0.72	1.775	1.862	0.57425	1.334	1.776	0.96575	1.033	1.685	0.801	2.50575	1.364	0.977	1.4655	0.346	0.692	2.063	1.3065	1.799	1.039	0.94	1.281	1.603	1.482	2.3165	2.101	1.5995	1.196	0.563	1.967	0.96	42.0927

## Sheet: Community FR
		Code	A1	CH1	P1	P2	P3	P4	CH2	CH3	CH4	CH5	CH6	CH7	CH8	CX1	CH9	CH10	CX2	CX3	CX4	CX5	CX6	CX7	CX8	CX9	AA1	AA2	AA3	AA4	AA5	AA6	AM1	AM2
	Probe	VR	Water	Pyruvic acid methyl ester	Tween 40	Tween 80	α-Cyclodextrin	Glycogen	d-Cellobiose	α-d-Lactose	β-Methyl-d-glucoside	d-Xylose	i-Erythritol	d-Mannitol	N-Acetyl-d-glucosamin e	d-Glucosaminic acid	Glucose-1-phosphate	d,l-α-Glycerol phosphate	d-Galactonic acid γ-lactone	d-Galacturonic acid	2-Hydroxy benzoic acid	4-Hydroxy benzoic acid	γ-Hydroxy butyric acid	Itaconic acid	α-Keto butyric acid	d-Malic acid	l-Arginine	l-Asparagine	l-Phenylalanine	l-Serine	l-Threonine	Glycyl-l-glutamic acid	Phenylethylamine	Putrescine	Sum	Fa (%)
	P6	V2R1		2.083	2.481	2.415	1.93	3.071	2.691	2.095	2.27	1.764	1.342	1.745	2.314	1.341	1.649	0.551	1.471	1.432	2.994	2.302	2.56	2.706	0.85	1.491	2.833	2.502	2.152	1.858	1.29	1.164	2.772	1.073	61.192	20.5356
	P7	V2R2		1.588	2.01	2.935	2.31	2.21	2.126	1.915	1.531	2.412	1.038	2.364	2.167	1.414	0.231	0.295	1.256	1.787	2.471	2.077	2.395	2.612	1.196	1.751	2.392	3.009	2.157	2.367	1.364	1.369	2.348	0.943	58.04	14.3268
	P8	V2R3		1.263	2.309	1.503	1.922	2.191	2.165	1.912	2.154	1.795	2.427	1.978	2.01	1.811	1.801	0.409	1.563	2.058	2.171	2.827	2.71	2.714	1.378	1.457	2.333	2.374	2.55	1.88	1.402	1.937	1.771	0.862	59.637	17.4726
	P9	V2R4		0.631	2.474	2.312	2.026	2.104	2.326	1.919	2.022	2.608	1.542	2.247	2.424	1.78	1.85	0.529	1.997	1.78	2.47	2.414	2.487	2.036	1.521	1.375	2.031	3.025	3.337	1.287	1.561	1.647	1.811	1.31	60.883	19.9269
	P10	V3R1		0.944	1.705	2.562	2.021	2.127	2.12	1.803	1.617	1.782	1.905	2.668	2.154	1.198	1.236	0.348	2.265	2.337	1.246	1.908	1.931	2.377	1.332	1.201	2.621	2.832	2.721	1.859	1.536	1.396	1.902	0.71	56.364	11.0254
	P11	V3R2		1.839	1.69	1.575	2.05	2.161	1.738	2.298	1.421	2.384	0.453	1.618	1.65	1.528	1.151	0.388	1.838	1.859	1.047	3.023	2.747	1.234	1.291	2.066	2.313	2.341	1.401	2.353	2.423	1.695	1.9	1.082	54.557	7.46601
	P12	V3R3		1.775	2.031	2.063	0.045	1.411	3.268	1.589	0.437	0.765	0.66	2.266	2.322	3.049	0.279	0.313	1.761	2.377	2.125	2.134	2.877	1.156	1.293	2.047	2.517	2.955	2.654	0.612	1.558	0.362	2.247	0.941	51.889	2.2106
	P13	V3R4		1.25	2.627	2.748	0.284	0.298	2.784	0.302	0.302	0.584	0.261	2.966	2.772	2.678	2.317	0.372	2.231	2.08	1.433	2.676	2.575	1.732	1.22	2.2	2.328	2.758	2.722	2.084	2.068	0.737	1.258	1.67	54.317	6.99326
	P14	V4R1		1.536	1.948	2.061	0.422	1.778	1.177	0.375	0.187	0.723	0.155	2.473	2.713	0.965	0.187	0.295	1.606	2.255	2.404	1.464	3.105	1.93	1.223	2.401	1.798	2.729	2.631	2.052	1.917	0.202	0.626	0.544	45.882	-9.62195
	P15	V4R2		1.188	1.677	1.607	0.239	0.431	2.22	1.418	0.856	2.359	0.265	2.371	1.814	1.139	0.25	0.347	2.152	1.775	2.38	1.59	2.037	1.848	0.776	2.233	2.088	2.861	2.753	2.096	1.127	0.661	1.339	0.618	46.515	-8.37507
	P16	V4R3		1.732	2.507	1.805	0.36	0.41	1.238	0.393	0.321	0.526	0.327	3.075	2.663	2.604	0.47	0.4	1.471	2.4	0.535	2.213	3.703	1.436	1.449	0.489	2.823	2.152	3.107	0.47	2.07	0.801	2.684	0.389	47.023	-7.37441
	P17	V4R4		1.073	2.397	1.479	1.163	1.375	2.264	0.17	0.128	1.775	0.929	2.116	1.432	1.051	1.096	0.224	1.128	2.059	0.455	2.116	0.049	0.232	2.036	1.933	2.13	2.653	2.53	1.269	1.644	1.478	0.795	1.265	42.444	-16.3941
	P18	V5R1		1.284	1.495	1.269	0.206	1.734	1.65	1.666	1.421	1.665	0.194	2.452	1.469	1.173	0.308	0.542	1.149	1.937	2.09	2.578	2.603	0.261	1.386	1.711	1.409	2.767	2.307	2.561	2.066	1.251	2.191	1.306	48.101	-5.25098
	P19	V5R2		1.003	1.87	1.915	1.277	0.888	3.012	1.854	1.046	2.106	1.149	2.189	2.292	1.421	1.305	0.56	0.974	2.356	1.645	1.928	1.793	2.041	1.481	1.203	1.495	2.03	2.393	1.85	1.64	1.22	1.52	1.54	50.996	0.451575
	P20	V5R3		1.588	1.76	1.443	1.62	1.97	2.182	1.895	1.283	2.006	1.693	2.252	2.172	1.06	1.291	0.417	1.73	0.964	1.318	2.317	2.33	3.215	1.017	0.983	1.704	2.623	1.377	1.607	1.064	1.169	1.859	0.071	49.98	-1.54973
	P21	V5R4		0.72	1.775	1.862	1.592	1.334	1.776	1.479	1.344	1.85	0.801	3.34	1.364	0.977	1.933	0.346	0.692	2.063	2.011	1.799	1.039	0.94	1.281	1.637	1.482	2.379	2.289	2.022	1.196	0.563	1.967	0.96	46.813	-7.78807
Average V1	Control			1.13325	2.02875	1.9225	0.57425	1.70175	1.7895	0.96575	1.033	1.685	1.15575	2.50575	2.421	1.821	1.4655	0.44275	1.3345	2.1345	1.3065	2.22725	1.991	2.051	1.44525	1.603	2.1895	2.3165	2.101	1.5995	1.3555	1.304	2.12125	1.041	50.7668
WCfr (%)			V2R1	V2R2	V2R3	V2R4	V3R1	V3R2	V3R3	V3R4	V4R1	V4R2	V4R3	V4R4	V5R1	V5R2	V5R3	V5R4
		V2R1		Mean	89.6495
		V2R2	89.8064
		V2R3	90.0976	88.8534
		V2R4	88.6914	89.1585	91.2894
		V3R1						Mean	81.3624
		V3R2					85.2571
		V3R3					81.1192	79.5446
		V3R4					80.2703	77.8919	84.0913
		V4R1										Mean	77.3789
		V4R2									84.8924
		V4R3									80.1356	74.5643
		V4R4									75.5904	76.9096	72.1808
		V5R1														Mean	83.581
		V5R2													83.0943
		V5R3													80.4845	85.3431
		V5R4													84.8031	86.3049	81.4563
BCfr (%)			V2R1	V2R2	V2R3	V2R4	V3R1	V3R2	V3R3	V3R4	V4R1	V4R2	V4R3	V4R4	V5R1	V5R2	V5R3	V5R4
		V2R1					90.5951	88.973	87.3037	82.4015	88.1435	91.0029	84.2354	90.5146	90.6322	92.421	95.6463	92.579
		V2R2					91.1255	89.6494	88.3424	80.8071	91.5283	95.3864	82.2853	91.0305	94.0334	91.3111	93.5674	93.081
		V2R3					92.6283	91.365	86.766	83.4637	89.1809	92.2692	83.9525	94.3832	92.7403	93.0759	95.9944	94.587
		V2R4					93.2776	89.6365	88.5236	85.6988	89.8435	94.4964	85.0392	95.3445	92.0937	95.0153	94.6779	94.2302
		V3R1	83.4472	88.4941	87.5446	86.3542					88.0127	92.4949	82.7212	92.0978	88.7715	92.8308	94.1236	93.1942
		V3R2	79.3257	84.2695	83.5823	80.3229					83.8237	87.6792	79.8779	88.7475	91.1457	85.1537	88.7695	88.4156
		V3R3	74.0309	78.98	75.4934	75.4463					89.5907	87.6341	87.8145	84.6716	85.1625	82.2359	78.5514	82.7591
		V3R4	73.1435	75.6237	76.0182	76.4565					90.8592	89.455	89.2989	87.3433	83.3933	83.3163	77.3209	82.7163
		V4R1	66.0903	72.3553	68.6118	67.7069	71.645	70.4951	79.2191	76.7495					79.41	74.3392	72.6551	76.5236
		V4R2	69.1757	76.4456	71.9671	72.1959	76.3324	74.7548	78.5581	76.6059					82.4536	79.767	78.2713	82.084
		V4R3	64.7307	66.6661	66.1955	65.6801	69.0121	68.8473	79.5795	77.3073					73.7947	72.0115	69.3737	71.4609
		V4R4	62.7827	66.5696	67.1731	66.4685	69.3528	69.0434	69.2594	68.2512					74.7656	74.6647	69.894	76.9765
		V5R1	71.243	77.9307	74.8009	72.7592	75.7576	80.36	78.9454	73.8498	83.2505	85.265	75.4865	84.7305
		V5R2	77.0215	80.2292	79.5899	79.5854	83.9898	79.5957	80.8206	78.2223	82.625	87.4514	78.0958	89.7088
		V5R3	78.1213	80.5737	80.4501	77.7228	83.4628	81.3223	75.6615	71.1472	79.1443	84.1019	73.7363	82.3037
		V5R4	70.8246	75.0758	74.2475	72.4537	77.4022	75.8656	74.6632	71.2889	78.0764	82.6099	71.1418	84.9001

## Sheet: Percent Conversion
Readed values	Code	CH1	P1	P2	P3	P4	CH2	CH3	CH4	CH5	CH6	CH7	CH8	CX1	CH9	CH10	CX2	CX3	CX4	CX5	CX6	CX7	CX8	CX9	AA1	AA2	AA3	AA4	AA5	AA6	AM1	AM2	SUM		P	CH	CX	AA	AM	Sum		P	CH	CX	AA	AM		Dom	Codom
Intensification	V2	0.179033	0.320507	0.303721	0.0907214	0.268846	0.282709	0.152571	0.163196	0.079	0.182588	0	0	0	0.1835	0.0699467	0.1365	0	0.206404	0.07475	0.314543	0.324022	0	0	0.345902	0.1855	0.051	0.252693	0	0	0.33512	0.032	4.53477		0.983796	1.29254	1.05622	0.835095	0.36712	4.53477		21.6945	28.503	23.2915	18.4154	8.09566		28.503	23.2915
	V2	0.179033	0	0.303721	0.0907214	0.268846	0.282709	0.152571	0.163196	0.2662	0	0	0	0	0	0	0	0	0.206404	0	0.314543	0.324022	0	0.148	0.2025	0.365966	0.056	0.252693	0.0085	0.065	0.22675	0	3.87738		0.663289	1.04371	0.992969	0.950659	0.22675	3.87738		17.1066	26.918	25.6093	24.5181	5.84803		26.918	25.6093
	V2	0.12975	0.28025	0	0.0907214	0.268846	0.282709	0.152571	0.163196	0.11	0.182588	0	0	0	0.231523	0	0.210827	0	0.206404	0.351866	0.314543	0.324022	0	0	0.1435	0.0575	0.331921	0.252693	0.0465	0.206009	0	0	4.33794		0.639818	1.25234	1.40766	1.03812	0	4.33794		14.7493	28.8694	32.45	23.9312	0		32.45	28.8694
	V2	0	0.320507	0.303721	0.0907214	0.268846	0.282709	0.152571	0.163196	0.2662	0.182588	0	0.003	0	0.231523	0.0699467	0.210827	0	0.206404	0.18675	0.314543	0	0.07575	0	0	0.365966	0.331921	0	0.2055	0.206009	0	0.16446	4.60366		0.983796	1.35173	0.994274	1.1094	0.16446	4.60366		21.3699	29.3622	21.5975	24.0981	3.57237		29.3622	24.0981
	V3	0	0	0.303721	0.0907214	0.268846	0.282709	0.152571	0.163196	0.097	0.182588	0.16225	0	0	0	0	0.210827	0.2025	0	0	0	0.324022	0	0	0.345902	0.365966	0.331921	0.252693	0.1805	0.092	0	0	4.00993		0.663289	1.04031	0.737349	1.56898	0	4.00993		16.5411	25.9434	18.3881	39.1274	0		39.1274	25.9434
	V3	0.179033	0	0	0.0907214	0.268846	0	0.152571	0.163196	0.2662	0	0	0	0	0	0	0.210827	0	0	0.351866	0.314543	0	0	0.253246	0.1235	0.0245	0	0.252693	0.214145	0.206009	0	0.041	3.1129		0.359568	0.761001	1.13048	0.820847	0.041	3.1129		11.5509	24.4467	36.3161	26.3692	1.3171		36.3161	26.3692
	V3	0.179033	0.00225	0.1405	0	0	0.282709	0.152571	0	0	0	0	0	0.287686	0	0	0.210827	0.2425	0.206404	0	0.314543	0	0	0.253246	0.3275	0.365966	0.331921	0	0.2025	0	0.12575	0	3.62591		0.14275	0.614314	1.51521	1.22789	0.12575	3.62591		3.93695	16.9424	41.7883	33.8643	3.4681		41.7883	33.8643
	V3	0.11675	0.320507	0.303721	0	0	0.282709	0	0	0	0	0.395864	0.351	0.287686	0.231523	0	0.210827	0	0.1265	0.351866	0.314543	0	0	0.253246	0.1385	0.365966	0.331921	0.252693	0.214145	0	0	0.16446	5.01443		0.624228	1.37785	1.54467	1.30322	0.16446	5.01443		12.4486	27.4777	30.8045	25.9895	3.27973		30.8045	27.4777
	V4	0.179033	0	0.1385	0	0.07625	0	0	0	0	0	0	0.292	0	0	0	0.210827	0.1205	0.206404	0	0.314543	0	0	0.253246	0	0.365966	0.331921	0.252693	0.214145	0	0	0	2.95603		0.21475	0.471033	1.10552	1.16472	0	2.95603		7.26482	15.9347	37.3988	39.4017	0		39.4017	37.3988
	V4	0.05475	0	0	0	0	0.282709	0.152571	0	0.2662	0	0	0	0	0	0	0.210827	0	0.206404	0	0.046	0	0	0.253246	0	0.365966	0.331921	0.252693	0	0	0	0	2.42329		0	0.756231	0.716477	0.95058	0	2.42329		0	31.2068	29.5663	39.2269	0		39.2269	31.2068
	V4	0.179033	0.320507	0	0	0	0	0	0	0	0	0.395864	0.242	0.287686	0	0	0.1365	0.2655	0	0	0.314543	0	0.00375	0	0.345902	0	0.331921	0	0.214145	0	0.33512	0	3.37247		0.320507	0.816898	1.00798	0.891968	0.33512	3.37247		9.50361	24.2225	29.8884	26.4485	9.93693		29.8884	26.4485
	V4	0	0.320507	0	0.0907214	0	0.282709	0	0	0.09	0	0	0	0	0	0	0	0	0	0	0	0	0.228324	0.253246	0	0.3365	0.331921	0	0.214145	0.174	0	0.16446	2.48653		0.411228	0.372709	0.48157	1.05657	0.16446	2.48653		16.5382	14.9891	19.3671	42.4915	6.61401		42.4915	19.3671
	V5	0.15075	0	0	0	0.03225	0	0.152571	0.163196	0	0	0	0	0	0	0.0699467	0	0	0.206404	0.35075	0.314543	0	0	0.108	0	0.365966	0.206	0.252693	0.214145	0	0.06975	0.16446	2.82142		0.03225	0.536464	0.979697	1.0388	0.23421	2.82142		1.14304	19.0139	34.7235	36.8184	8.30111		36.8184	34.7235
	V5	0	0	0	0.0907214	0	0.282709	0.152571	0.013	0.2662	0	0	0	0	0	0.0699467	0	0.2215	0.206404	0	0	0	0.03575	0	0	0	0.292	0.2505	0.214145	0	0	0.16446	2.25991		0.0907214	0.784428	0.463654	0.756645	0.16446	2.25991		4.01438	34.7106	20.5165	33.4812	7.27727		34.7106	33.4812
	V5	0.179033	0	0	0.0907214	0.26825	0.282709	0.152571	0.163196	0.2662	0.182588	0	0	0	0	0	0.210827	0	0.0115	0.08975	0.314543	0.324022	0	0	0	0.3065	0	0.0075	0	0	0	0	2.84991		0.358971	1.2263	0.950642	0.314	0	2.84991		12.5959	43.0293	33.3569	11.0179	0		43.0293	33.3569
	V5	0	0	0	0.0907214	0	0	0.152571	0.163196	0.165	0	0.395864	0	0	0.231523	0	0	0	0.206404	0	0	0	0	0.034	0	0.0625	0.188	0.252693	0	0	0	0	1.94247		0.0907214	1.10815	0.240404	0.503193	0	1.94247		4.67041	57.0487	12.3762	25.9048	0		57.0487	25.9048
Narrowing	V2	0	0	0	0	0	0	0	0	0	0	0.393421	0.107	0.28591	0	0	0	0.335132	0	0	0	0	0.226915	0.112	0	0	0	0	0.0655	0.14	0	0	1.66588		0	0.500421	0.959957	0.2055	0	1.66588		0	30.0395	57.6247	12.3358	0		57.6247	30.0395
	V2	0	0.01875	0	0	0	0	0	0	0	0.11775	0.14175	0.254	0.28591	0.230094	0.069515	0.0785	0.335132	0	0.15025	0	0	0.226915	0	0	0	0	0	0	0	0	0.098	2.00657		0.01875	0.813109	1.07671	0	0.098	2.00657		0.934432	40.5224	53.6592	0	4.88397		53.6592	40.5224
	V2	0	0	0.301847	0	0	0	0	0	0	0	0.393421	0.380115	0.01	0	0.03375	0	0.0765	0	0	0	0	0.06725	0.146	0	0	0	0	0	0	0.333052	0.163445	1.90538		0.301847	0.807286	0.29975	0	0.496496	1.90538		15.8418	42.3688	15.7318	0	26.0576		42.3688	26.0576
	V2	0.177929	0	0	0	0	0	0	0	0	0	0.25875	0	0.041	0	0	0	0.335132	0	0	0	0.015	0	0.228	0.1585	0	0	0.251133	0	0	0.31025	0	1.77569		0	0.436679	0.619132	0.409633	0.31025	1.77569		0	24.592	34.8671	23.0689	17.472		34.8671	24.592
	V3	0.177929	0.318529	0	0	0	0	0	0	0	0	0	0.267	0.28591	0.2295	0.069515	0	0	0.0605	0.31925	0.06	0	0.11325	0.251683	0	0	0	0	0	0	0.21925	0.163445	2.53576		0.318529	0.743943	1.09059	0	0.382695	2.53576		12.5615	29.3381	43.0085	0	15.0919		43.0085	29.3381
	V3	0	0.318529	0.301847	0	0	0.0515	0	0	0	0.181461	0.393421	0.380115	0.28591	0.230094	0.05475	0	0.2755	0.20513	0	0	0.322022	0.15425	0	0	0	0.329872	0	0	0	0.22125	0	3.70565		0.620375	1.29134	1.24281	0.329872	0.22125	3.70565		16.7413	34.8479	33.5383	8.90187	5.97061		34.8479	33.5383
	V3	0	0	0	0.0901614	0.267187	0	0	0.162189	0.264557	0.181461	0.23975	0.099	0	0.230094	0.069515	0	0	0	0.09325	0	0.322022	0.15225	0	0	0	0	0.251133	0	0.204738	0	0.1	2.72731		0.357349	1.24657	0.567522	0.455871	0.1	2.72731		13.1026	45.7068	20.8089	16.715	3.66662		45.7068	20.8089
	V3	0	0	0	0.0901614	0.267187	0	0.15163	0.162189	0.264557	0.181461	0	0	0	0	0.069515	0	0.0545	0	0	0	0.319	0.22525	0	0	0	0	0	0	0.204738	0.333052	0	2.32324		0.357349	0.829352	0.59875	0.204738	0.333052	2.32324		15.3815	35.6981	25.7722	8.81259	14.3357		35.6981	25.7722
	V4	0	0.08075	0	0.0901614	0	0.280965	0.15163	0.162189	0.264557	0.181461	0.03275	0	0.28591	0.230094	0.069515	0	0	0	0.349694	0	0.121	0.22225	0	0.343767	0	0	0	0	0.204738	0.333052	0.163445	3.56793		0.170911	1.37316	0.978855	0.548505	0.496496	3.56793		4.79022	38.4862	27.4348	15.3732	13.9155		38.4862	27.4348
	V4	0	0.318529	0.301847	0.0901614	0.267187	0	0	0.162189	0	0.181461	0.13475	0.380115	0.28591	0.230094	0.069515	0	0.335132	0	0.349694	0	0.203	0.226915	0	0.1015	0	0	0	0.212823	0.204738	0.333052	0.163445	4.55206		0.977724	1.15812	1.40065	0.519061	0.496496	4.55206		21.4787	25.4418	30.7696	11.4028	10.9071		30.7696	25.4418
	V4	0	0	0.1175	0.0901614	0.267187	0.280965	0.15163	0.162189	0.264557	0.181461	0	0	0	0.230094	0.04275	0	0	0.20513	0.01425	0	0.322022	0	0.251683	0	0.1645	0	0.251133	0	0.204738	0	0.163445	3.36539		0.474849	1.31365	0.793085	0.620371	0.163445	3.36539		14.1097	39.0339	23.5659	18.4338	4.85663		39.0339	23.5659
	V4	0.06025	0	0.301847	0	0.267187	0	0.15163	0.162189	0	0.181461	0.38975	0.380115	0.28591	0.230094	0.069515	0.2065	0.0755	0.20513	0.11125	0.312602	0.322022	0	0	0.0595	0	0	0.251133	0	0	0.333052	0	4.35664		0.569034	1.625	1.51891	0.310633	0.333052	4.35664		13.0613	37.2995	34.8644	7.13012	7.6447		37.2995	34.8644
	V5	0	0.318529	0.301847	0.0901614	0	0.1395	0	0	0.02	0.181461	0.05375	0.380115	0.28591	0.230094	0	0.1855	0.1975	0	0	0	0.322022	0.05925	0	0.343767	0	0	0	0	0.053	0	0	3.16241		0.710537	1.00492	1.05018	0.396767	0	3.16241		22.4682	31.7771	33.2083	12.5464	0		33.2083	31.7771
	V5	0.13025	0.15875	0.0075	0	0.267187	0	0	0	0	0.00675	0.31675	0.129	0.28591	0.1605	0	0.209526	0	0	0.29925	0.198	0.01	0	0.251683	0.343767	0.2865	0	0	0	0.084	0.333052	0	3.47838		0.433437	0.74325	1.25437	0.714267	0.333052	3.47838		12.4609	21.3677	36.0619	20.5345	9.57492		36.0619	21.3677
	V5	0	0.26875	0.301847	0	0	0	0	0	0	0	0.25375	0.249	0.28591	0.1745	0.02575	0	0.335132	0	0	0	0	0.226915	0.251683	0.343767	0	0.329872	0	0.212823	0.135	0.26225	0.163445	3.82039		0.570597	0.703	1.09964	1.02146	0.425695	3.82039		14.9355	18.4012	28.7834	26.7371	11.1427		28.7834	26.7371
	V5	0.177929	0.25375	0.0605	0	0.267187	0.0135	0	0	0	0.181461	0	0.380115	0.28591	0	0.069515	0.209526	0.0715	0	0.349694	0.312602	0.322022	0.16425	0	0.343767	0	0	0	0.1595	0.204738	0.15425	0.081	4.06272		0.581437	0.822519	1.7155	0.708005	0.23525	4.06272		14.3115	20.2456	42.2256	17.4269	5.79046		42.2256	20.2456
Expansion	V2	0.770717	0.131743	0.188779	1.26503	1.1004	0.618791	0.976679	1.0738	0	0.00366191	0	0	0	0	0.0383033	0	0	1.4811	0	0.254457	0.330978	0	0	0.297598	0	0	0.00580725	0	0	0.31563	0	8.85348		2.68595	3.48196	2.06653	0.303405	0.31563	8.85348		30.3379	39.3287	23.3415	3.42696	3.56504		39.3287	30.3379
	V2	0.275717	0	0.708779	1.64503	0.239404	0.0537906	0.796679	0.334804	0.4608	0	0	0	0	0	0	0	0	0.958096	0	0.0894572	0.236978	0	0	0	0.326534	0	0.514807	0	0	0	0	6.64087		2.59321	1.92179	1.28453	0.841341	0	6.64087		39.0492	28.9388	19.3428	12.6691	0		39.0492	28.9388
	V2	0	0	0	1.25703	0.220404	0.0927906	0.793679	0.957804	0	1.08866	0	0	0	0.103977	0	0.0176726	0	0.658096	0.247884	0.404457	0.338978	0	0	0	0	0.117079	0.0278072	0	0.426991	0	0	6.75331		1.47743	3.03691	1.66709	0.571877	0	6.75331		21.8772	44.9692	24.6855	8.46811	0		44.9692	24.6855
	V2	0	0.124743	0.0857789	1.36103	0.133404	0.253791	0.800679	0.825804	0.6568	0.203662	0	0	0	0.152977	0.0163033	0.451673	0	0.957096	0	0.181457	0	0	0	0	0.342534	0.904079	0	0	0.136991	0	0.10454	7.69334		1.70495	2.91002	1.59023	1.3836	0.10454	7.69334		22.1614	37.8251	20.6702	17.9844	1.35884		37.8251	22.1614
	V3	0	0	0.335779	1.35603	0.156404	0.0477906	0.684679	0.420804	0	0.566662	0	0	0	0	0	0.719673	0	0	0	0	0.00197822	0	0	0.0855977	0.149534	0.288079	0.00680725	0	0	0	0	4.81982		1.84821	1.71994	0.721651	0.530018	0	4.81982		38.3461	35.6847	14.9726	10.9966	0		38.3461	35.6847
	V3	0.526717	0	0	1.38503	0.190404	0	1.17968	0.224804	0.4328	0	0	0	0	0	0	0.292673	0	0	0.443884	0.441457	0	0	0.209754	0	0	0	0.500807	0.853355	0.184991	0	0	6.86635		1.57543	2.364	1.38777	1.53915	0	6.86635		22.9442	34.4287	20.2111	22.4159	0		34.4287	22.9442
	V3	0.462717	0	0	0	0	1.19579	0.470679	0	0	0	0	0	0.940314	0	0	0.215673	0	0.612096	0	0.571457	0	0	0.190754	0	0.272534	0.221079	0	0	0	0	0	5.15309		0	2.12919	2.53029	0.493613	0	5.15309		0	41.3186	49.1024	9.57897	0		49.1024	41.3186
	V3	0	0.277743	0.521779	0	0	0.711791	0	0	0	0	0.0643857	0	0.569314	0.619977	0	0.685673	0	0	0.0968838	0.269457	0	0	0.343754	0	0.0755339	0.289079	0.231807	0.498355	0	0	0.46454	5.72007		0.799522	1.39615	1.96508	1.09478	0.46454	5.72007		13.9775	24.408	34.3541	19.1392	8.12123		34.3541	24.408
	V4	0.223717	0	0	0	0	0	0	0	0	0	0	0	0	0	0	0.0606726	0	0.891096	0	0.799457	0	0	0.544754	0	0.0465339	0.198079	0.199807	0.347355	0	0	0	3.31147		0	0.223717	2.29598	0.791775	0	3.31147		0	6.7558	69.3341	23.9101	0		69.3341	23.9101
	V4	0	0	0	0	0	0.147791	0.299679	0	0.4078	0	0	0	0	0	0	0.606673	0	0.867096	0	0	0	0	0.376754	0	0.178534	0.320079	0.243807	0	0	0	0	3.44821		0	0.855269	1.85052	0.74242	0	3.44821		0	24.8033	53.6662	21.5306	0		53.6662	24.8033
	V4	0.419717	0.157743	0	0	0	0	0	0	0	0	0.173386	0	0.495314	0	0	0	0	0	0	1.39746	0	0	0	0.287598	0	0.674079	0	0.500355	0	0.22763	0	4.33328		0.157743	0.593102	1.89277	1.46203	0.22763	4.33328		3.64028	13.6871	43.6799	33.7396	5.25307		43.6799	33.7396
	V4	0	0.0477433	0	0.498029	0	0.191791	0	0	0	0	0	0	0	0	0	0	0	0	0	0	0	0.362426	0.0767543	0	0	0.0970791	0	0.0743549	0	0	0.0595404	1.40772		0.545772	0.191791	0.43918	0.171434	0.0595404	1.40772		38.77	13.6242	31.198	12.1782	4.22957		38.77	31.198
	V5	0	0	0	0	0	0	0.547679	0.224804	0	0	0	0	0	0	0.0293033	0	0	0.577096	0	0.297457	0	0	0	0	0.0845339	0	0.708807	0.496355	0	0	0.10054	3.06658		0	0.801786	0.874553	1.2897	0.10054	3.06658		0	26.146	28.5189	42.0566	3.27859		42.0566	28.5189
	V5	0	0	0	0.612029	0	0.939791	0.735679	0	0.1548	0	0	0	0	0	0.0473033	0	0	0.132096	0	0	0	0	0	0	0	0	0	0.0703549	0	0	0.33454	3.02659		0.612029	1.87757	0.132096	0.0703549	0.33454	3.02659		20.2217	62.0358	4.36451	2.32456	11.0534		62.0358	20.2217
	V5	0.275717	0	0	0.955029	0	0.109791	0.776679	0.0868042	0.0547998	0.354662	0	0	0	0	0	0.184673	0	0	0	0.0244572	0.839978	0	0	0	0	0	0	0	0	0	0	3.66259		0.955029	1.65845	1.04911	0	0	3.66259		26.0752	45.2809	28.6439	0	0		45.2809	28.6439
	V5	0	0	0	0.927029	0	0	0.360679	0.147804	0	0	0.438386	0	0	0.235977	0	0	0	0.498096	0	0	0	0	0	0	0	0	0.169807	0	0	0	0	2.77778		0.927029	1.18285	0.498096	0.169807	0	2.77778		33.373	42.5824	17.9315	6.11306	0		42.5824	33.373
Contraction	V2	0	0	0	0	0	0	0	0	0	0	0.367329	0	0.19409	0	0	0	0.367368	0	0	0	0	0.368335	0	0	0	0	0	0	0	0	0	1.29712		0	0.367329	0.929793	0	0	1.29712		0	28.3188	71.6812	0	0		71.6812	28.3188
	V2	0	0	0	0	0	0	0	0	0	0	0	0	0.12109	1.00441	0.078235	0	0.0123679	0	0	0	0	0.0223352	0	0	0	0	0	0	0	0	0	1.23843		0	1.08264	0.155793	0	0	1.23843		0	87.4202	12.5798	0	0		87.4202	12.5798
	V2	0	0	0.117653	0	0	0	0	0	0	0	0.134329	0.0308853	0	0	0	0	0	0	0	0	0	0	0	0	0	0	0	0	0	0.0171983	0.0155554	0.315621		0.117653	0.165214	0	0	0.0327537	0.315621		37.2768	52.3457	0	0	10.3775		52.3457	37.2768
	V2	0.324321	0	0	0	0	0	0	0	0	0	0	0	0	0	0	0	0.0193679	0	0	0	0	0	0	0	0	0	0.0613668	0	0	0	0	0.405056		0	0.324321	0.0193679	0.0613668	0	0.405056		0	80.0683	4.78154	15.1502	0		80.0683	15.1502
	V3	0.0113215	0.00522145	0	0	0	0	0	0	0	0	0	0	0.33709	0	0.025235	0	0	0	0	0	0	0	0.150317	0	0	0	0	0	0	0	0.167555	0.69674		0.00522145	0.0365565	0.487407	0	0.167555	0.69674		0.749412	5.24679	69.9553	0	24.0485		69.9553	24.0485
	V3	0	0.0202215	0.0456535	0	0	0	0	0	0	0.521289	0.494329	0.390885	0.00708972	0.0844058	0	0	0	0.05437	0	0	0.494978	0	0	0	0	0.370128	0	0	0	0	0	2.48335		0.0658749	1.49091	0.556438	0.370128	0	2.48335		2.65266	60.0362	22.4067	14.9044	0		60.0362	22.4067
	V3	0	0	0	0.439089	0.0235628	0	0	0.433811	0.655443	0.314289	0	0	0	0.956406	0.060235	0	0	0	0	0	0.572978	0	0	0	0	0	0.736367	0	0.737262	0	0	4.92944		0.462651	2.42018	0.572978	1.47363	0	4.92944		9.38547	49.0965	11.6236	29.8944	0		49.0965	29.8944
	V3	0	0	0	0.200089	1.13656	0	0.51212	0.568811	0.836443	0.713289	0	0	0	0	0.00123502	0	0	0	0	0	0	0	0	0	0	0	0	0	0.362262	0.530198	0	4.86101		1.33665	2.6319	0	0.362262	0.530198	4.86101		27.4974	54.143	0	7.45241	10.9072		54.143	27.4974
	V4	0	0	0	0.0620886	0	0.331535	0.43912	0.683811	0.697443	0.819289	0	0	0.57009	1.04841	0.078235	0	0	0	0.413556	0	0	0	0	0.0477325	0	0	0	0	0.897262	1.1622	0.333555	7.58432		0.0620886	4.09784	0.983645	0.944995	1.49575	7.58432		0.818644	54.0304	12.9695	12.4598	19.7217		54.0304	19.7217
	V4	0	0.0332215	0.0136535	0.245089	1.00356	0	0	0.0148115	0	0.709289	0	0.226885	0.39609	0.985406	0.026235	0	0.0243679	0	0.287556	0	0	0.442335	0	0	0	0	0	0.0156766	0.438262	0.449198	0.259555	5.57119		1.29553	1.96263	1.15035	0.453939	0.708754	5.57119		23.254	35.2281	20.6481	8.14797	12.7218		35.2281	23.254
	V4	0	0	0	0.124089	1.02456	0.270535	0.42112	0.549811	0.894443	0.647289	0	0	0	0.765406	0	0	0	0.56637	0	0	0.292978	0	0.862317	0	0	0	0.878367	0	0.298262	0	0.488555	8.08411		1.14865	3.5486	1.72167	1.17663	0.488555	8.08411		14.2088	43.8961	21.2969	14.5548	6.04341		43.8961	21.2969
	V4	0	0	0.141653	0	0.0595628	0	0.64412	0.742811	0	0.0452888	0	0.608885	0.48409	0.139406	0.149235	0	0	0.64637	0	1.6294	1.49698	0	0	0	0	0	0.0793668	0	0	0.993198	0	7.86036		0.201216	2.32975	4.25684	0.0793668	0.993198	7.86036		2.55989	29.6392	54.1557	1.00971	12.6355		54.1557	29.6392
	V5	0	0.215221	0.351653	0.278089	0	0	0	0	0	0.780289	0	0.571885	0.36209	0.927406	0	0	0	0	0	0	1.46798	0	0	0.436733	0	0	0	0	0	0	0	5.39134		0.844963	2.27958	1.83007	0.436733	0	5.39134		15.6726	42.2822	33.9446	8.10062	0		42.2822	33.9446
	V5	0	0	0	0	0.546563	0	0	0	0	0	0	0	0.11409	0	0	0.150974	0	0	0	0	0	0	0.148317	0.350733	0	0	0	0	0	0.268198	0	1.57887		0.546563	0	0.413381	0.350733	0.268198	1.57887		34.6172	0	26.182	22.2141	16.9867		34.6172	26.182
	V5	0	0	0.177653	0	0	0	0	0	0	0	0	0	0.47509	0	0	0	0.835368	0	0	0	0	0.201335	0.368317	0.141733	0	0.394128	0	0.0786766	0	0	0.806555	3.47886		0.177653	0	1.88011	0.614537	0.806555	3.47886		5.10666	0	54.0439	17.6649	23.1845		54.0439	23.1845
	V5	0.235321	0	0	0	0.100563	0	0	0	0	0.173289	0	0.676885	0.55809	0	0.027235	0.432974	0	0	0.0785555	0.639398	0.788978	0	0	0.363733	0	0	0	0	0.536262	0	0	4.61128		0.100563	1.11273	2.498	0.899995	0	4.61128		2.1808	24.1306	54.1714	19.5172	0		54.1714	24.1306
Percent conversion	Code	CH1	P1	P2	P3	P4	CH2	CH3	CH4	CH5	CH6	CH7	CH8	CX1	CH9	CH10	CX2	CX3	CX4	CX5	CX6	CX7	CX8	CX9	AA1	AA2	AA3	AA4	AA5	AA6	AM1	AM2	SUM		Dom	Codom		Dom	Codom
Intensification	V2	3.94801	7.06775	6.6976	2.00057	5.92855	6.23426	3.36448	3.59876	1.74209	4.0264	0	0	0	4.04651	1.54245	3.01007	0	4.55158	1.64837	6.93624	7.14527	0	0	7.62777	4.09061	1.12464	5.57233	0	0	7.39001	0.705658	100		7.62777	7.39001		AA1	AM1
	V2	4.61739	0	7.83316	2.33976	6.93372	7.29125	3.93491	4.20892	6.86547	0	0	0	0	0	0	0	0	5.32329	0	8.11226	8.35673	0	3.81701	5.2226	9.4385	1.44428	6.51711	0.21922	1.67639	5.84803	0	100		9.4385	8.35673		AA2	CX7
	V2	2.99105	6.46044	0	2.09135	6.19756	6.51713	3.51714	3.76206	2.53577	4.2091	0	0	0	5.33717	0	4.86008	0	4.75811	8.11136	7.25097	7.46948	0	0	3.30802	1.32551	7.65158	5.82518	1.07194	4.749	0	0	100		8.11136	7.65158		CX5	AA3
	V2	0	6.962	6.59738	1.97064	5.83984	6.14097	3.31413	3.54491	5.78236	3.96615	0	0.0651655	0	5.02911	1.51937	4.57956	0	4.48347	4.05655	6.83245	0	1.64543	0	0	7.94946	7.20994	0	4.46384	4.4749	0	3.57237	100		7.94946	7.20994		AA2	AA3
	V3	0	0	7.57421	2.26241	6.70451	7.05022	3.80484	4.06979	2.41899	4.55339	4.0462	0	0	0	0	5.25763	5.04996	0	0	0	8.08047	0	0	8.62613	9.12648	8.27746	6.30167	4.50132	2.2943	0	0	100		9.12648	8.62613		AA2	AA1
	V3	5.75135	0	0	2.91437	8.63653	0	4.90127	5.24257	8.55153	0	0	0	0	0	0	6.77271	0	0	11.3035	10.1045	0	0	8.13537	3.96736	0.787048	0	8.11761	6.87928	6.61792	0	1.3171	100		11.3035	10.1045		CX5	CX6
	V3	4.93762	0.0620534	3.87489	0	0	7.79693	4.20781	0	0	0	0	0	7.93418	0	0	5.81447	6.68798	5.69248	0	8.67487	0	0	6.98434	9.03222	10.0931	9.15415	0	5.58481	0	3.4681	0	100		10.0931	9.15415		AA2	AA3
	V3	2.32828	6.39169	6.05694	0	0	5.63792	0	0	0	0	7.89451	6.9998	5.73716	4.61714	0	4.20442	0	2.52272	7.01708	6.27276	0	0	5.05034	2.76203	7.29826	6.61932	5.03931	4.27058	0	0	3.27973	100		7.89451	7.29826		CH7	AA2
	V4	6.05656	0	4.68534	0	2.57947	0	0	0	0	0	0	9.87812	0	0	0	7.13212	4.07642	6.98247	0	10.6407	0	0	8.56709	0	12.3803	11.2286	8.54839	7.24435	0	0	0	100		12.3803	11.2286		AA2	AA3
	V4	2.25933	0	0	0	0	11.6664	6.29605	0	10.9851	0	0	0	0	0	0	8.70006	0	8.51752	0	1.89825	0	0	10.4505	0	15.102	13.6971	10.4277	0	0	0	0	100		15.102	13.6971		AA2	AA3
	V4	5.30867	9.50361	0	0	0	0	0	0	0	0	11.7381	7.17575	8.53042	0	0	4.04748	7.87256	0	0	9.32678	0	0.111194	0	10.2566	0	9.84207	0	6.3498	0	9.93693	0	100		11.7381	10.2566		CH7	AA1
	V4	0	12.8897	0	3.64851	0	11.3696	0	0	3.6195	0	0	0	0	0	0	0	0	0	0	0	0	9.18242	10.1847	0	13.5329	13.3487	0	8.6122	6.9977	0	6.61401	100		13.5329	13.3487		AA2	AA3
	V5	5.34305	0	0	0	1.14304	0	5.4076	5.78416	0	0	0	0	0	0	2.47913	0	0	7.31559	12.4317	11.1484	0	0	3.82785	0	12.971	7.30128	8.95621	7.58996	0	2.47216	5.82896	100		12.971	12.4317		AA2	CX5
	V5	0	0	0	4.01438	0	12.5098	6.75122	0.575245	11.7793	0	0	0	0	0	3.09511	0	9.80129	9.13329	0	0	0	1.58192	0	0	0	12.9209	11.0845	9.47583	0	0	7.27727	100		12.9209	12.5098		AA3	CH2
	V5	6.28207	0	0	3.1833	9.41257	9.91993	5.35355	5.72634	9.34065	6.4068	0	0	0	0	0	7.39768	0	0.403521	3.14922	11.0369	11.3695	0	0	0	10.7547	0	0.263166	0	0	0	0	100		11.3695	11.0369		CX7	CX6
	V5	0	0	0	4.67041	0	0	7.8545	8.40144	8.49433	0	20.3794	0	0	11.919	0	0	0	10.6258	0	0	0	0	1.75035	0	3.21755	9.67839	13.0088	0	0	0	0	100		20.3794	13.0088		CH7	AA4
Narrowing	V2	0	0	0	0	0	0	0	0	0	0	23.6164	6.42304	17.1627	0	0	0	20.1174	0	0	0	0	13.6213	6.72318	0	0	0	0	3.93186	8.40398	0	0	100		23.6164	20.1174		CH7	CX3
	V2	0	0.934432	0	0	0	0	0	0	0	5.86823	7.06431	12.6584	14.2487	11.4671	3.46437	3.91216	16.7018	0	7.48792	0	0	11.3086	0	0	0	0	0	0	0	0	4.88397	100		16.7018	14.2487		CX3	CX1
	V2	0	0	15.8418	0	0	0	0	0	0	0	20.6479	19.9496	0.52483	0	1.7713	0	4.01495	0	0	0	0	3.52948	7.66252	0	0	0	0	0	0	17.4796	8.57806	100		20.6479	19.9496		CH7	CH8
	V2	10.0202	0	0	0	0	0	0	0	0	0	14.5718	0	2.30896	0	0	0	18.8733	0	0	0	0.84474	0	12.8401	8.92609	0	0	14.1428	0	0	17.472	0	100		18.8733	17.472		CX3	AM1
	V3	7.01677	12.5615	0	0	0	0	0	0	0	0	0	10.5294	11.2751	9.05054	2.74139	0	0	2.38587	12.5899	2.36615	0	4.46612	9.92534	0	0	0	0	0	0	8.64632	6.44559	100		12.5899	12.5615		CX5	P1
	V3	0	8.59575	8.14557	0	0	1.38977	0	0	0	4.89688	10.6168	10.2577	7.71552	6.20928	1.47747	0	7.43459	5.5356	0	0	8.69002	4.16256	0	0	0	8.90187	0	0	0	5.97061	0	100		10.6168	10.2577		CH7	CH8
	V3	0	0	0	3.30588	9.79674	0	0	5.94684	9.70031	6.65349	8.79072	3.62995	0	8.43668	2.54885	0	0	0	3.41912	0	11.8073	5.58243	0	0	0	0	9.2081	0	7.50695	0	3.66662	100		11.8073	9.79674		CX7	P4
	V3	0	0	0	3.88085	11.5006	0	6.52665	6.98114	11.3874	7.8107	0	0	0	0	2.99216	0	2.34586	0	0	0	13.7308	9.69551	0	0	0	0	0	0	8.81259	14.3357	0	100		14.3357	13.7308		AM1	CX7
	V4	0	2.26322	0	2.527	0	7.87473	4.2498	4.54573	7.41487	5.0859	0.9179	0	8.01334	6.44896	1.94833	0	0	0	9.80105	0	3.39132	6.22911	0	9.63493	0	0	0	0	5.73827	9.3346	4.58094	100		9.80105	9.63493		CX5	AA1
	V4	0	6.99747	6.63099	1.98068	5.86959	0	0	3.56297	0	3.98636	2.9602	8.35039	6.2809	5.05473	1.52711	0	7.36221	0	7.68212	0	4.45952	4.98489	0	2.22976	0	0	0	4.67532	4.49769	7.31651	3.59057	100		8.35039	7.68212		CH8	CX5
	V4	0	0	3.49142	2.67908	7.93925	8.34864	4.50556	4.8193	7.86111	5.39197	0	0	0	6.83707	1.27028	0	0	6.09528	0.423427	0	9.56863	0	7.47855	0	4.88799	0	7.46222	0	6.08361	0	4.85663	100		9.56863	8.34864		CX7	CH2
	V4	1.38295	0	6.92843	0	6.13288	0	3.48043	3.72279	0	4.16517	8.94612	8.72496	6.56264	5.28146	1.59561	4.7399	1.73299	4.70845	2.55358	7.1753	7.39153	0	0	1.36573	0	0	5.76438	0	0	7.6447	0	100		8.94612	8.72496		CH7	CH8
	V5	0	10.0723	9.54484	2.85104	0	4.4112	0	0	0.63243	5.73807	1.69966	12.0198	9.04091	7.27592	0	5.86579	6.24524	0	0	0	10.1828	1.87357	0	10.8704	0	0	0	0	1.67594	0	0	100		12.0198	10.8704		CH8	AA1
	V5	3.74456	4.56391	0.215618	0	7.68138	0	0	0	0	0.194056	9.10626	3.70863	8.21965	4.61422	0	6.02368	0	0	8.60315	5.69231	0.287491	0	7.23564	9.88299	8.2366	0	0	0	2.41492	9.57492	0	100		9.88299	9.57492		AA1	AM1
	V5	0	7.03461	7.90093	0	0	0	0	0	0	0	6.64198	6.51765	7.48379	4.56759	0.674014	0	8.77219	0	0	0	0	5.93956	6.58787	8.99822	0	8.63451	0	5.57072	3.53367	6.86448	4.27821	100		8.99822	8.77219		AA1	CX3
	V5	4.37955	6.24582	1.48915	0	6.57657	0.33229	0	0	0	4.4665	0	9.35617	7.03742	0	1.71105	5.15729	1.75991	0	8.60741	7.6944	7.92627	4.04286	0	8.46152	0	0	0	3.92595	5.03942	3.79672	1.99374	100		9.35617	8.60741		CH8	CX5
Expansion	V2	8.70524	1.48804	2.13226	14.2885	12.4291	6.98924	11.0316	12.1286	0	0.0413613	0	0	0	0	0.432636	0	0	16.729	0	2.87409	3.7384	0	0	3.36137	0	0	0.0655928	0	0	3.56504	0	100		16.729	14.2885		CX4	P3
	V2	4.15181	0	10.673	24.7713	3.605	0.809993	11.9966	5.04157	6.93884	0	0	0	0	0	0	0	0	14.4273	0	1.34707	3.56848	0	0	0	4.91703	0	7.7521	0	0	0	0	100		24.7713	14.4273		P3	CX4
	V2	0	0	0	18.6135	3.26364	1.374	11.7524	14.1827	0	16.1204	0	0	0	1.53964	0	0.261687	0	9.74479	3.67055	5.98902	5.01944	0	0	0	0	1.73366	0.411757	0	6.32269	0	0	100		18.6135	16.1204		P3	CH6
	V2	0	1.62145	1.11498	17.691	1.73401	3.29884	10.4074	10.734	8.53725	2.64725	0	0	0	1.98843	0.211915	5.87096	0	12.4406	0	2.35863	0	0	0	0	4.45234	11.7515	0	0	1.78064	0	1.35884	100		17.691	12.4406		P3	CX4
	V3	0	0	6.96664	28.1345	3.24501	0.991544	14.2055	8.73071	0	11.7569	0	0	0	0	0	14.9315	0	0	0	0	0.0410435	0	0	1.77595	3.10248	5.97697	0.141235	0	0	0	0	100		28.1345	14.9315		P3	CX2
	V3	7.67098	0	0	20.1712	2.77299	0	17.1806	3.274	6.3032	0	0	0	0	0	0	4.26242	0	0	6.46462	6.42928	0	0	3.05481	0	0	0	7.29364	12.4281	2.69417	0	0	100		20.1712	17.1806		P3	CH3
	V3	8.97939	0	0	0	0	23.2053	9.1339	0	0	0	0	0	18.2476	0	0	4.1853	0	11.8782	0	11.0896	0	0	3.70174	0	5.28874	4.29022	0	0	0	0	0	100		23.2053	18.2476		CH2	CX1
	V3	0	4.85559	9.12189	0	0	12.4437	0	0	0	0	1.12561	0	9.95292	10.8386	0	11.9871	0	0	1.69375	4.71073	0	0	6.00961	0	1.32051	5.05377	4.05252	8.71239	0	0	8.12123	100		12.4437	11.9871		CH2	CX2
	V4	6.7558	0	0	0	0	0	0	0	0	0	0	0	0	0	0	1.83219	0	26.9094	0	24.142	0	0	16.4505	0	1.40523	5.9816	6.03379	10.4894	0	0	0	100		26.9094	24.142		CX4	CX6
	V4	0	0	0	0	0	4.28601	8.69084	0	11.8264	0	0	0	0	0	0	17.5938	0	25.1463	0	0	0	0	10.9261	0	5.17758	9.28247	7.07054	0	0	0	0	100		25.1463	17.5938		CX4	CX2
	V4	9.68589	3.64028	0	0	0	0	0	0	0	0	4.00126	0	11.4305	0	0	0	0	0	0	32.2494	0	0	0	6.63695	0	15.5559	0	11.5468	0	5.25307	0	100		32.2494	15.5559		CX6	AA3
	V4	0	3.39154	0	35.3785	0	13.6242	0	0	0	0	0	0	0	0	0	0	0	0	0	0	0	25.7457	5.45239	0	0	6.89621	0	5.28195	0	0	4.22957	100		35.3785	25.7457		P3	CX8
	V5	0	0	0	0	0	0	17.8596	7.33079	0	0	0	0	0	0	0.955571	0	0	18.8189	0	9.69998	0	0	0	0	2.75662	0	23.114	16.186	0	0	3.27859	100		23.114	18.8189		AA4	CX4
	V5	0	0	0	20.2217	0	31.0511	24.3072	0	5.11466	0	0	0	0	0	1.56292	0	0	4.36451	0	0	0	0	0	0	0	0	0	2.32456	0	0	11.0534	100		31.0511	24.3072		CH2	CH3
	V5	7.52791	0	0	26.0752	0	2.99762	21.2057	2.37002	1.4962	9.68337	0	0	0	0	0	5.04213	0	0	0	0.667756	22.934	0	0	0	0	0	0	0	0	0	0	100		26.0752	22.934		P3	CX7
	V5	0	0	0	33.373	0	0	12.9844	5.32095	0	0	15.7819	0	0	8.49517	0	0	0	17.9315	0	0	0	0	0	0	0	0	6.11306	0	0	0	0	100		33.373	17.9315		P3	CX4
Contraction	V2	0	0	0	0	0	0	0	0	0	0	28.3188	0	14.9631	0	0	0	28.3218	0	0	0	0	28.3963	0	0	0	0	0	0	0	0	0	100		28.3963	28.3218		CX8	CX3
	V2	0	0	0	0	0	0	0	0	0	0	0	0	9.77765	81.1029	6.31726	0	0.998675	0	0	0	0	1.8035	0	0	0	0	0	0	0	0	0	100		81.1029	9.77765		CH9	CX1
	V2	0	0	37.2768	0	0	0	0	0	0	0	42.5601	9.78556	0	0	0	0	0	0	0	0	0	0	0	0	0	0	0	0	0	5.44902	4.9285	100		42.5601	37.2768		CH7	P2
	V2	80.0683	0	0	0	0	0	0	0	0	0	0	0	0	0	0	0	4.78154	0	0	0	0	0	0	0	0	0	15.1502	0	0	0	0	100		80.0683	15.1502		CH1	AA4
	V3	1.62492	0.749412	0	0	0	0	0	0	0	0	0	0	48.381	0	3.62187	0	0	0	0	0	0	0	21.5744	0	0	0	0	0	0	0	24.0485	100		48.381	24.0485		CX1	AM2
	V3	0	0.814282	1.83838	0	0	0	0	0	0	20.9914	19.9057	15.7402	0.28549	3.39887	0	0	0	2.18938	0	0	19.9319	0	0	0	0	14.9044	0	0	0	0	0	100		20.9914	19.9319		CH6	CX7
	V3	0	0	0	8.90747	0.478002	0	0	8.80042	13.2965	6.37575	0	0	0	19.4019	1.22194	0	0	0	0	0	11.6236	0	0	0	0	0	14.9381	0	14.9563	0	0	100		19.4019	14.9563		CH9	AA6
	V3	0	0	0	4.11619	23.3812	0	10.5353	11.7015	17.2072	14.6737	0	0	0	0	0.0254067	0	0	0	0	0	0	0	0	0	0	0	0	0	7.45241	10.9072	0	100		23.3812	17.2072		P4	CH5
	V4	0	0	0	0.818644	0	4.37133	5.78984	9.01612	9.19585	10.8024	0	0	7.51669	13.8233	1.03154	0	0	0	5.45277	0	0	0	0	0.629358	0	0	0	0	11.8305	15.3237	4.39796	100		15.3237	13.8233		AM1	CH9
	V4	0	0.596308	0.245073	4.39921	18.0134	0	0	0.265858	0	12.7314	0	4.07247	7.1096	17.6875	0.470905	0	0.437392	0	5.16147	0	0	7.93968	0	0	0	0	0	0.281387	7.86658	8.06287	4.65888	100		18.0134	17.6875		P4	CH9
	V4	0	0	0	1.53497	12.6738	3.34651	5.20924	6.80114	11.0642	8.00693	0	0	0	9.46803	0	0	0	7.00597	0	0	3.62412	0	10.6668	0	0	0	10.8654	0	3.68949	0	6.04341	100		12.6738	11.0642		P4	CH5
	V4	0	0	1.80212	0	0.757762	0	8.19453	9.45009	0	0.576167	0	7.74627	6.15862	1.77353	1.89858	0	0	8.22316	0	20.7293	19.0446	0	0	0	0	0	1.00971	0	0	12.6355	0	100		20.7293	19.0446		CX6	CX7
	V5	0	3.99198	6.52256	5.15806	0	0	0	0	0	14.473	0	10.6075	6.71613	17.2018	0	0	0	0	0	0	27.2284	0	0	8.10062	0	0	0	0	0	0	0	100		27.2284	17.2018		CX7	CH9
	V5	0	0	0	0	34.6172	0	0	0	0	0	0	0	7.22602	0	0	9.56211	0	0	0	0	0	0	9.39386	22.2141	0	0	0	0	0	16.9867	0	100		34.6172	22.2141		P4	AA1
	V5	0	0	5.10666	0	0	0	0	0	0	0	0	0	13.6565	0	0	0	24.0127	0	0	0	0	5.7874	10.5873	4.07411	0	11.3292	0	2.26157	0	0	23.1845	100		24.0127	23.1845		CX3	AM2
	V5	5.10317	0	0	0	2.1808	0	0	0	0	3.75793	0	14.6789	12.1027	0	0.590617	9.38944	0	0	1.70355	13.866	17.1097	0	0	7.88788	0	0	0	0	11.6294	0	0	100		17.1097	14.6789		CX7	CH8
Av reading val		CH1	P1	P2	P3	P4	CH2	CH3	CH4	CH5	CH6	CH7	CH8	CX1	CH9	CH10	CX2	CX3	CX4	CX5	CX6	CX7	CX8	CX9	AA1	AA2	AA3	AA4	AA5	AA6	AM1	AM2	SUM		P	CH	CX	AA	AM	Sum		P	CH	CX	AA	AM		Dom	Codom
Intensification	V2	0.121954	0.230316	0.227791	0.0907214	0.268846	0.282709	0.152571	0.163196	0.18035	0.136941	0	0.00075	0	0.161637	0.0349733	0.139539	0	0.206404	0.153342	0.314543	0.243016	0.0189375	0.037	0.172976	0.243733	0.19271	0.18952	0.065125	0.119254	0.140468	0.0491149	4.33844		0.817674	1.23508	1.11278	0.983318	0.189582	4.33844		18.8472	28.4684	25.6493	22.6653	4.36983		28.4684	25.6493
	V3	0.118704	0.0806892	0.186986	0.0453607	0.134423	0.212032	0.114429	0.0815979	0.0908001	0.045647	0.139529	0.08775	0.143843	0.0578808	0	0.210827	0.11125	0.083226	0.175933	0.235907	0.0810054	0	0.189934	0.233851	0.2806	0.248941	0.18952	0.202823	0.0745022	0.0314375	0.0513649	3.94079		0.447459	0.948369	1.23193	1.23024	0.0828024	3.94079		11.3545	24.0654	31.2609	31.218	2.10116		31.2609	31.218
	V4	0.103204	0.160253	0.034625	0.0226803	0.0190625	0.141355	0.0381429	0	0.0890501	0	0.0989661	0.1335	0.0719215	0	0	0.139539	0.0965	0.103202	0	0.168771	0	0.0580185	0.189934	0.0864756	0.267108	0.331921	0.126346	0.160609	0.0435	0.08378	0.0411149	2.80958		0.236621	0.604218	0.827886	1.01596	0.124895	2.80958		8.42194	21.5056	29.4666	36.1606	4.44532		36.1606	29.4666
	V5	0.0824459	0	0	0.068041	0.075125	0.141355	0.152571	0.125647	0.17435	0.045647	0.0989661	0	0	0.0578808	0.0349733	0.0527069	0.055375	0.157678	0.110125	0.157271	0.0810054	0.0089375	0.0355	0	0.183742	0.1715	0.190846	0.107073	0	0.0174375	0.0822298	2.46843		0.143166	0.913836	0.658599	0.65316	0.0996673	2.46843		5.79988	37.021	26.6809	26.4606	4.03768		37.021	26.6809
Narrowing	V2	0.0444821	0.0046875	0.0754616	0	0	0	0	0	0	0.0294375	0.296836	0.185279	0.155705	0.0575235	0.0258162	0.019625	0.270474	0	0.0375625	0	0.00375	0.13027	0.1215	0.039625	0	0	0.0627833	0.016375	0.035	0.160825	0.0653611	1.83838		0.0801491	0.639374	0.738887	0.153783	0.226187	1.83838		4.35977	34.7792	40.1923	8.36516	12.3036		40.1923	34.7792
	V3	0.0444821	0.159264	0.0754616	0.0450807	0.133594	0.012875	0.0379074	0.0810943	0.132279	0.136096	0.158293	0.186529	0.142955	0.172422	0.0658237	0	0.0825	0.0664075	0.103125	0.015	0.240761	0.16125	0.0629207	0	0	0.0824681	0.0627833	0	0.102369	0.193388	0.0658611	2.82299		0.4134	1.0278	0.874919	0.24762	0.259249	2.82299		14.6441	36.4082	30.9927	8.77156	9.18349		36.4082	30.9927
	V4	0.0150625	0.0998196	0.180298	0.0676211	0.20039	0.140482	0.113722	0.162189	0.132279	0.181461	0.139312	0.190057	0.214433	0.230094	0.0628237	0.051625	0.102658	0.102565	0.206222	0.0781504	0.242011	0.112291	0.0629207	0.126192	0.041125	0	0.125567	0.0532058	0.153553	0.249789	0.122583	3.9605		0.548129	1.36748	1.17288	0.499642	0.372372	3.9605		13.8399	34.528	29.6143	12.6156	9.40214		34.528	29.6143
	V5	0.0770446	0.249945	0.167923	0.0225404	0.133594	0.03825	0	0	0.005	0.0924181	0.156062	0.284557	0.28591	0.141274	0.0238162	0.151138	0.151033	0	0.162236	0.12765	0.163511	0.112604	0.125841	0.343767	0.071625	0.0824681	0	0.0930808	0.119184	0.187388	0.0611111	3.63097		0.574002	0.818422	1.27992	0.710126	0.248499	3.63097		15.8085	22.54	35.2502	19.5575	6.84387		35.2502	22.54
Expansion	V2	0.261608	0.0641217	0.245834	1.38203	0.423404	0.254791	0.841929	0.798054	0.2794	0.323996	0	0	0	0.0642384	0.0136517	0.117336	0	1.0136	0.061971	0.232457	0.226734	0	0	0.0743994	0.167267	0.25529	0.137105	0	0.140996	0.0789075	0.0261351	7.48525		2.11539	2.83767	1.65209	0.775057	0.105043	7.48525		28.2608	37.9101	22.0713	10.3545	1.40333		37.9101	28.2608
	V3	0.247358	0.0694358	0.214389	0.685264	0.0867018	0.488843	0.583759	0.161402	0.1082	0.141665	0.0160964	0	0.377407	0.154994	0	0.478423	0	0.153024	0.135192	0.320593	0.000494555	0	0.186066	0.0213994	0.1244	0.199559	0.184855	0.337927	0.0462478	0	0.116135	5.63983		1.05579	1.90232	1.6512	0.91439	0.116135	5.63983		18.7203	33.73	29.2774	16.2131	2.05919		33.73	29.2774
	V4	0.160858	0.0513717	0	0.124507	0	0.0848953	0.0749196	0	0.10195	0	0.0433464	0	0.123829	0	0	0.166836	0	0.439548	0	0.549229	0	0.0906065	0.249566	0.0718994	0.056267	0.322329	0.110904	0.230516	0	0.0569075	0.0148851	3.12517		0.175879	0.46597	1.61961	0.791915	0.0717926	3.12517		5.62782	14.9102	51.8248	25.3399	2.29724		51.8248	25.3399
	V5	0.0689291	0	0	0.623521	0	0.262395	0.605179	0.114853	0.0523999	0.0886655	0.109596	0	0	0.0589942	0.0191517	0.0461681	0	0.301822	0	0.0804786	0.209995	0	0	0	0.0211335	0	0.219654	0.141677	0	0	0.10877	3.13338		0.623521	1.38016	0.638463	0.382465	0.10877	3.13338		19.8993	44.0471	20.3762	12.2061	3.47133		44.0471	20.3762
Contraction	V2	0.0810804	0	0.0294134	0	0	0	0	0	0	0	0.125414	0.00772134	0.0787949	0.251101	0.0195588	0	0.0997759	0	0	0	0	0.0976676	0	0	0	0	0.0153417	0	0	0.00429957	0.00388885	0.814058		0.0294134	0.484876	0.276238	0.0153417	0.00818842	0.814058		3.61318	59.5629	33.9335	1.8846	1.00588		59.5629	33.9335
	V3	0.00283037	0.00636073	0.0114134	0.159794	0.290031	0	0.12803	0.250656	0.372971	0.387217	0.123582	0.0977213	0.0860449	0.260203	0.0216763	0	0	0.0135925	0	0	0.266989	0	0.0375793	0	0	0.0925319	0.184092	0	0.274881	0.13255	0.0418889	3.24264		0.4676	1.64489	0.404206	0.551505	0.174438	3.24264		14.4204	50.7268	12.4653	17.0079	5.37953		50.7268	17.0079
	V4	0	0.00830536	0.0388267	0.107816	0.521922	0.150518	0.37609	0.497811	0.397971	0.555289	0	0.208943	0.362567	0.734656	0.0634263	0	0.00609198	0.303185	0.175278	0.40735	0.447489	0.110584	0.215579	0.0119331	0	0	0.239433	0.00391915	0.408447	0.651149	0.270417	7.275		0.676871	2.9847	2.02812	0.663733	0.921565	7.275		9.30407	41.0269	27.878	9.12348	12.6676		41.0269	27.878
	V5	0.0588304	0.0538054	0.132327	0.0695221	0.161781	0	0	0	0	0.238394	0	0.312193	0.37734	0.231851	0.00680876	0.145987	0.208842	0	0.0196389	0.15985	0.564239	0.0503338	0.129159	0.323233	0	0.0985319	0	0.0196692	0.134066	0.0670496	0.201639	3.76509		0.417436	0.848078	1.65539	0.575499	0.268688	3.76509		11.087	22.5248	43.9668	15.2851	7.13631		43.9668	22.5248
Av % conversion val		CH1	P1	P2	P3	P4	CH2	CH3	CH4	CH5	CH6	CH7	CH8	CX1	CH9	CH10	CX2	CX3	CX4	CX5	CX6	CX7	CX8	CX9	AA1	AA2	AA3	AA4	AA5	AA6	AM1	AM2	SUM		Dom	Codom		Dom	Codom
Intensification	V2	2.88911	5.12255	5.28204	2.10058	6.22492	6.5459	3.53267	3.77866	4.23142	3.05041	0	0.0162914	0	3.6032	0.765456	3.11243	0	4.77911	3.45407	7.28298	5.74287	0.411357	0.954253	4.0396	5.70102	4.35761	4.47865	1.43875	2.72507	3.30951	1.06951	100		7.28298	6.5459		CX6	CH2
	V3	3.25431	1.61344	4.37651	1.2942	3.83526	5.12127	3.22848	2.32809	2.74263	1.13835	2.98518	1.74995	3.41783	1.15429	0	5.51231	2.93448	2.0538	4.58014	6.26303	2.02012	0	5.04251	6.09694	6.82622	6.01273	4.86465	5.309	2.22805	0.867024	1.14921	100		6.82622	6.26303		AA2	CX6
	V4	3.40614	5.59833	1.17134	0.912127	0.644869	5.75899	1.57401	0	3.65115	0	2.93453	4.26347	2.1326	0	0	4.96991	2.98725	3.875	0	5.46644	0	2.3234	7.30057	2.56416	10.2538	12.0291	4.74402	5.55159	1.74942	2.48423	1.6535	100		12.0291	10.2538		AA3	AA2
	V5	2.90628	0	0	2.96702	2.6389	5.60743	6.34172	5.1218	7.40356	1.6017	5.09485	0	0	2.97975	1.39356	1.84942	2.45032	6.86956	3.89522	5.54633	2.84238	0.395481	1.39455	0	6.73581	7.47514	8.32818	4.26645	0	0.618039	3.27656	100		8.32818	7.47514		AA4	AA3
Narrowing	V2	2.50506	0.233608	3.96045	0	0	0	0	0	0	1.46706	16.4751	9.75776	8.56131	2.86677	1.30892	0.978039	14.9269	0	1.87198	0	0.211185	7.11486	6.80644	2.23152	0	0	3.5357	0.982965	2.10099	8.7379	3.36551	100		16.4751	14.9269		CH7	CX3
	V3	1.75419	5.2893	2.03639	1.79668	5.32434	0.347442	1.63166	3.23199	5.27194	4.84027	4.85188	6.10426	4.74766	5.92413	2.43997	0	2.44511	1.98037	4.00226	0.591539	8.55704	5.97666	2.48133	0	0	2.22547	2.30202	0	4.07988	7.23815	2.52805	100		8.55704	7.23815		CX7	AM1
	V4	0.345737	2.31517	4.26271	1.79669	4.98543	4.05584	3.05895	4.1627	3.819	4.65735	3.20606	4.26884	5.21422	5.90555	1.58533	1.18497	2.2738	2.70093	5.11504	1.79382	6.20275	2.8035	1.86964	3.30761	1.222	0	3.30665	1.16883	4.07989	6.07395	3.25703	100		6.20275	6.07395		CX7	AM1
	V5	2.03103	6.97917	4.78763	0.71276	3.56449	1.18587	0	0	0.158107	2.59966	4.36198	7.90056	7.94544	4.11443	0.596265	4.26169	4.19433	0	4.30264	3.34668	4.59914	2.964	3.45588	9.55329	2.05915	2.15863	0	2.37417	3.16599	5.05903	1.56799	100		9.55329	7.94544		AA1	CX1
Expansion	V2	3.21426	0.777372	3.48005	18.8411	5.25793	3.11802	11.297	10.5217	3.86902	4.70226	0	0	0	0.882019	0.161138	1.53316	0	13.3354	0.917638	3.1422	3.08158	0	0	0.840341	2.34234	3.37128	2.05736	0	2.02583	0.89126	0.339711	100		18.8411	13.3354		P3	CX4
	V3	4.16259	1.2139	4.02213	12.0764	1.5045	9.16014	10.13	3.00118	1.5758	2.93923	0.281403	0	7.05012	2.70965	0	8.8416	0	2.96956	2.03959	5.5574	0.0102609	0	3.19154	0.443988	2.42793	3.83024	2.87185	5.28511	0.673542	0	2.03031	100		12.0764	10.13		P3	CH3
	V4	4.11042	1.75795	0	8.84461	0	4.47756	2.17271	0	2.9566	0	1.00032	0	2.85762	0	0	4.85651	0	13.0139	0	14.0979	0	6.43641	8.20725	1.65924	1.6457	9.42904	3.27608	6.82955	0	1.31327	1.05739	100		14.0979	13.0139		CX6	CX4
	V5	1.88198	0	0	19.9175	0	8.51218	19.0892	3.75544	1.65271	2.42084	3.94547	0	0	2.12379	0.629624	1.26053	0	10.2787	0	2.59193	5.7335	0	0	0	0.689156	0	7.30676	4.62763	0	0	3.58299	100		19.9175	19.0892		P3	CH3
Contraction	V2	20.0171	0	9.31919	0	0	0	0	0	0	0	17.7197	2.44639	6.18519	20.2757	1.57931	0	8.5255	0	0	0	0	7.54996	0	0	0	0	3.78755	0	0	1.36226	1.23213	100		20.2757	20.0171		CH9	CH1
	V3	0.40623	0.390923	0.459596	3.25592	5.9648	0	2.63382	5.12548	7.62592	10.5102	4.97643	3.93506	12.1666	5.70019	1.2173	0	0	0.547345	0	0	7.88887	0	5.39359	0	0	3.72609	3.73453	0	5.60218	2.72679	6.01212	100		12.1666	10.5102		CX1	CH6
	V4	0	0.149077	0.511799	1.68821	7.86124	1.92946	4.7984	6.3833	5.06502	8.02921	0	2.95469	5.19623	10.6881	0.850254	0	0.109348	3.80728	2.65356	5.18232	5.66719	1.98492	2.66671	0.157339	0	0	2.96877	0.0703467	5.84664	9.00552	3.77506	100		10.6881	9.00552		CH9	AM1
	V5	1.27579	0.997995	2.90731	1.28951	9.19951	0	0	0	0	4.55773	0	6.32159	9.92533	4.30044	0.147654	4.73789	6.00318	0	0.425887	3.46649	11.0845	1.44685	4.99529	10.5692	0	2.83231	0	0.565391	2.90734	4.24667	5.79613	100		11.0845	10.5692		CX7	AA1
[truncated: 2 more columns]
